1 **Evaluating the effects of arousal and emotional valence on performance of racing**  
2 **greyhounds**

3 Melissa Starling<sub>1</sub>, Anthony Spurrett<sub>1</sub>, Paul McGreevy<sub>1</sub>

4 <sub>1</sub> School of Veterinary Science, Faculty of Science, University of Sydney, NSW 2006,

5 Australia

6 Corresponding author: Melissa Starling

7

## 8 **Abstract**

9 The racing greyhound industry in Australia has come under scrutiny in recent years due to  
10 animal welfare concerns, including so-called behavioural wastage whereby physically sound  
11 greyhounds are removed from the racing industry because of poor performance. The non-  
12 medical reasons why greyhounds perform poorly at the racetrack are not well understood, but  
13 may include insufficient reinforcement for racing, or negative affective states associated with  
14 the context of racing. This study sought evidence for the affective states of greyhounds  
15 (n=525) at race meets and associations of those states with performance. It collected  
16 demographic, behavioural and performance data, along with infrared thermographic images  
17 of greyhounds at race-meets to investigate whether arousal influenced performance. It also  
18 collected behavioural data in the catching pen at the completion of races to examine possible  
19 evidence of frustration that may reflect sub-optimal behavioural reinforcement.

20

21 Linear regression models were built to determine factors affecting greyhound performance.  
22 Increasing mean eye temperature after the race and increasing greyhound age both had a  
23 statistically significant, negative effect on performance. The start box number also had a  
24 significant effect, with boxes 4, 5 and 7 having a negative effect on performance. There was a  
25 significant effect of track on mean eye temperatures before and after the race, suggesting that  
26 some tracks may be inherently more stressful for greyhounds than others. Behaviours that  
27 may indicate frustration in the catching pen were extremely common at two tracks, but much  
28 less common at the third, where play objects in motion were used to draw greyhounds into  
29 the catching pen. The study provides evidence for the use of eye temperature in predicting  
30 performance, guidance for assessment of poor performance in greyhounds and suggested  
31 approaches to the management of frustration in racing greyhounds.



## 33 **Introduction**

34

35 Greyhound racing in Australia is a sport supported largely by revenue from betting on the  
36 outcome of races. As such, there may be pressure on owners of racing greyhounds to race  
37 their dogs as often as they are physically able so that race winnings support the greyhounds'  
38 upkeep and further racing activities. Recent scrutiny into the greyhound racing industry in  
39 Australia, and in particular, the state of New South Wales (NSW), has raised questions about  
40 the level of so-called wastage of greyhounds within the racing industry, which is where  
41 greyhounds are discarded from racing because they do not perform the task they were bred  
42 for, i.e., racing [1]. Wastage can be physical e.g., from lameness, or behavioural e.g., from  
43 relative disinterest in running. The ultimate fate of discarded dogs is unknown, but may  
44 include rehoming to a pet home, being retired but retained by the original owner or trainer, or  
45 euthanasia. Failing to chase a lure is considered a form of behavioural wastage, which is  
46 where otherwise physically healthy and sound animals are removed from a role because they  
47 are unable to perform it adequately due to behavioural unsuitability [2]. It is therefore critical  
48 to understand why greyhounds may fail to adequately perform the activity they were  
49 specifically bred to perform. This is a multi-faceted issue with many potential contributing  
50 factors, and little research has been conducted on it to date. Although it is likely that most  
51 behavioural wastage has taken place before greyhounds reach the track [1], a key component  
52 of understanding why greyhounds may fail to chase is in understanding their experience of  
53 race meets.

54 Greyhound races in Australia begin with a so-called stir-up, which is where greyhounds may  
55 watch the lure traverse the track usually twice while they are in a pen outside the track. Pre-  
56 stir-up occurs approximately ten minutes before the start of each greyhound race, and five  
57 minutes before the stir-up under Australian greyhound racing rules [3]. Pre-stir-up involves

58 the collection of the dogs from their kennel and walking them to a grass area next to the track  
59 where they may eliminate, and fitting them with a racing rug and any additional pre-race  
60 preparations such as taping body parts for protection against injury. After witnessing the lure  
61 traverse the track, the greyhounds are walked to their starting boxes, loaded into the boxes,  
62 and then released from the boxes and chase the lure for a set distance. At the end of the race,  
63 a gate is swung across the track immediately behind the lure to stop the greyhounds from  
64 chasing it,. The lure itself draws away from the greyhounds and passes through a small flap in  
65 this gate, and the greyhounds are diverted into the catching pen alongside the track, where  
66 they are caught by handlers and then led from the track. The catching pen is unique to  
67 Australia, and, it is argued by industry participants [4], may be a source of frustration for  
68 greyhounds, as they are unable to capture the lure and there is rarely an object in the catching  
69 pen for them to interact with in lieu of capturing the lure. The consequences of frustration  
70 may be subsequent failure to chase or redirection of frustration onto nearby dogs, both of  
71 which attract penalties if they occur during races rather than in the catching pen. Furthermore,  
72 the risk of injury in the catching pen may be greater if greyhounds redirect frustration onto  
73 nearby conspecifics as race participants are decelerating at different rates.

74 Many factors influence performance of racing animals. Previous research on racehorses has  
75 shown that horses that finished as winners (top 20% of finishers) tended to be less aroused in  
76 the mounting yard immediately before the race than the losers (bottom 20% of finishers) [5],  
77 with arousal being determined by behavioural indicators. High arousal may lead to a  
78 reduction in fine motor control [6], and may also compromise judgement and cognitive  
79 processing [7]. These outcomes may manifest in racing greyhounds that show poor cornering  
80 or manoeuvring around other dogs, starting a race too fast or expending excessive energy in  
81 the stir-up and fatiguing early, or interfering with other dogs during the race. However, it is  
82 impossible to tell whether a dog is performing according to a typical pattern they employ on

83 the racetrack, or if they are performing differently from usual, so it is necessary to seek  
84 indicators of sub-optimal arousal. We therefore employed the use of an infrared  
85 thermographic (IRT) camera to record the surface temperature of greyhound eyes before and  
86 after the race. IRT detects infrared radiation, providing a pictorial representation of surface  
87 temperature [8]. Typically, vascular perfusion of the extremities changes during stress  
88 responses, which include increased arousal. In animals, this can be detected by a change in  
89 the surface temperature of superficial, hair-coat-free, anatomical landmarks of an animal that  
90 are perfused by extensive capillary networks, such as the eye and inside the ears [9]. Due to  
91 parasympathetic activation, dogs may exhibit an increase in heart rate and peripheral  
92 vasodilation upon the onset of a stress response, resulting in increased metabolic heat  
93 production, and an increase in surface temperature, which is most easily detected on the  
94 surface of the eye [8]. Such increases in eye temperature can be detected by IRT, and has  
95 successfully assessed arousal in a variety of animals including mice [9], rabbits [10], horses  
96 [11-15] and dogs [8,16-18].

97 Heightened arousal prior to the race in greyhounds may be caused by distress related to the  
98 racetrack environment including kennelling. Anticipation may also heighten arousal levels  
99 [16,18,19], which may in turn be influenced by how long the dog has been kennelled for at  
100 the race meet, or how many days it has been since the dog last raced, or how experienced the  
101 dog is with the procedure at race-meets. A previous study on racing greyhounds revealed an  
102 increase in arousal in dogs that race as well as those that have merely watched racing [20],  
103 suggesting greyhound arousal increases with anticipation of an opportunity to race. Road  
104 transport over an hour in duration is regarded as distressing for livestock animals [21], and  
105 studies on air travel in dogs show it increases behavioural and physiological signs of distress  
106 [22,23].

107 The current study aimed to determine possible effects of arousal and frustration on  
108 performance in racing greyhounds at race-meets. As well as obtaining IRT images of  
109 greyhounds before and after races, behavioural observations were collected of greyhounds  
110 during the stir-up immediately prior to racing, and in the catching pen at the conclusion of  
111 races to explore putative behavioural indicators of increased arousal before racing and signs  
112 of frustration in the catching pen associated with being thwarted in capturing the lure.

### 113 **Methods**

114 The University of Sydney Animal Ethics Committee approved the current study (Approval  
115 number: 2016/1015). The owners/handlers of the greyhounds provided informed consent for  
116 the collection of infrared images.

### 117 **Location**

118 The study was conducted at three greyhound racetracks in NSW over a period of 6 months.  
119 The tracks were Richmond and Wentworth Park in the Sydney metropolitan area in June and  
120 July 2017 respectively, and Gosford on the New South Wales Central Coast, approximately  
121 80km north of Sydney, in October and November 2017. Data were collected from 3 race  
122 meets at Richmond, with 11 races per meet, 2 race meets at Wentworth Park with 10 races  
123 per meet, and 3 race meets at Gosford with 8, 10 and 11 races respectively.

124 Each track was configured differently (see supplemental material for diagrams). Minimum  
125 distances between features of the track and where on the grounds greyhounds were subject to  
126 potentially arousing stimuli were measured using the measurement tool in Google Earth Pro  
127 (Google Earth Pro version 7.3.2.5776, Google LLC 2019).

128 During the period of data collection, the Richmond racetrack was trialling a bungee teaser in  
129 the catching pen. Teasers consisted of two toys made of synthetic fur attached to one bungee  
130 line each that was in turn anchored at the back fence of the catching pen. To offer teasers, the

131 track steward operating the catching pen gate walks onto the track with the teasers, stretching  
132 both bungee lines taut. The steward releases the teasers as the dogs approach the catching  
133 pen, providing a moving stimulus across the track and into the catching pen. The teasers  
134 come to rest in the sand trap of the catching pen and the dogs are able to interact with them.  
135 All greyhounds racing are muzzled, so interactions with the teaser are restricted. This system  
136 was in place for all race-meets where data were collected at Richmond.

### 137 **Dogs**

138 A total of 525 greyhounds were recruited to this study over the 8 race meets at 3 racetracks.  
139 The races included were for both male and female greyhounds aged 1-6 years old, and dogs  
140 varied in experience, with their number of starts ranging 0-177. The dogs arrived at the  
141 racetrack in air-conditioned dog trailers, which is the current policy of Greyhound Racing  
142 NSW (GRNSW). Upon entry to the racetrack the dogs undergo vetting: an approximately 30-  
143 second veterinary physical examination to ensure quality of health. The dogs are then  
144 kennelled in an air-conditioned building where they remain until they are taken out at pre-  
145 stir-up, approximately 10-15 minutes before their race. Dogs were excluded from data  
146 collection if they had already been recorded by the current team of investigators at a prior  
147 race or race-meet.

### 148 **Physiological data collection**

149 IRT data were collected twice from each dog during each race meet, with the first IR  
150 thermograph being taken during pre-stir-up. The second IR was taken 15 minutes after the  
151 race while the greyhound was kennelled. Post-race kennelling proceeds after greyhounds are  
152 hosed down and offered water to drink upon finishing the race.

153 IRT images were captured using a FLIR T640 Professional Thermal Imaging camera (T640,  
154 FLIR Systems Inc. Danderyd, Sweden) at an 80° or 100° angle and 1m distance from the dog.



155 The FLIR ResearchIR Max software program was used to calculate the average eye  
156 temperature under the 1234 palette because it best exposed the circumference of the eye.  
157 Greyhound eye temperature was calculated by tracing the eye lids of the greyhounds using  
158 the Stats tool then using Statistics Viewer to calculate the mean and max temperature inside  
159 the traced area.

#### 160 **Behavioural data collection**

161 The behaviour of the dogs was recorded using one GoPro Hero3 Black Edition action camera  
162 (Manufacturer's name and address) mounted onto the fence of the catching pen, and one  
163 hand-held Sony HD Handycam HDR-PJ760 video camera. The videos were analysed in slow  
164 motion in Windows Media Player 11 (Microsoft, Redmond, Washington, USA) (0.5x speed)  
165 and a count of each of the behaviours listed in the ethogram (Table 1 and 2) were recorded  
166 for each dog. Greyhounds whose trainers excluded them from the optional stir-up event were  
167 not analysed with an ethogram, and were recorded as being absent.

168 The ethograms were informed in part by Travain et al 2015 [8], who used an ethogram to  
169 estimate distress in a group of 14 dogs, with behaviours being considered indicative of  
170 distress when they were accompanied by a significant increase in eye temperature (detected  
171 by IRT) [8]. No racing-specific ethogram for dogs has been developed before, so several  
172 behaviours were added to the ethograms that were considered good candidates for detecting  
173 high arousal, frustration, or fixation on the lure.

174

| <b>Behaviour</b> | <b>Description</b>                                                                                    | <b>Frequency</b> |
|------------------|-------------------------------------------------------------------------------------------------------|------------------|
| Rising (r)       | Unassisted rising onto hind legs without hind feet leaving the ground in vertical or lateral movement | Count            |

|                            |                                                                                                       |       |
|----------------------------|-------------------------------------------------------------------------------------------------------|-------|
| Owner-assisted rising (ro) | Owner lifting dog onto hind legs without hind feet leaving the ground in vertical or lateral movement | Count |
| Lunging (lu)               | Lateral thrust forward, therefore pulling on leash                                                    | Count |
| Spinning (s)               | Dog rotates laterally either clockwise or counter-clockwise for approximately a full revolution       | Count |
| Jumping (j)                | Both front and back feet leaving the ground so that a suspension phase occurs                         | Count |
| Barking (b)                | Barking                                                                                               | Count |

175 **Table 1:** Ethogram of all the behaviours potentially indicating arousal during stir-up in

176 greyhounds.

177

|                          |                                                                                                        |        |
|--------------------------|--------------------------------------------------------------------------------------------------------|--------|
| Grabbing the teaser (gt) | Teeth contact the teaser but are released before trainers contact the dog                              | Yes/no |
| Changing directions (cd) | An approximate 180° change in direction while in motion.                                               | Count  |
| Jostling (jo)            | Dog's muzzle makes physical contact with another dog with sufficient force to affect the receiving dog | Count  |

|                                                   |                                                                                                                              |        |
|---------------------------------------------------|------------------------------------------------------------------------------------------------------------------------------|--------|
| Attention directed to lure gate on racetrack (fl) | Dog orientating body position and interest towards the lure gate, or attention to the lure as it slows down around the track | Yes/no |
| Holding teaser (ht)                               | Teaser is grabbed and not released by the greyhound                                                                          | Yes/no |

178 **Table 2:** *Ethogram of all the behaviours (with abbreviations) that potentially indicate*

179 *negative emotional valence in greyhounds in the catching pen after a race*

180 **Questionnaire data collection**

181 The questionnaire for trainers consisted of 4 questions that were used to identify any indirect  
182 factors that may influence affective state:

- 183 1. How long did it take you to get to the racetrack (minutes)?
- 184 2. How many times has your greyhound raced (starts)?
- 185 3. How long since the greyhound's last race (days)?
- 186 4. How old is your greyhound (years, rounding to the nearest half year.)?

187 The data from this questionnaire were compiled along with the greyhounds' start box  
188 number, the date of the race, track, race distance, performance (placing), time of the race  
189 meet, and ambient temperature at the time of the dog's race. Ambient temperature was  
190 collected from records available from Time And Date AS, which purchases weather  
191 information from customweather.com [24]. The records are available on an hourly basis for  
192 the Richmond, Sydney city, and Gosford localities.

193 **Statistical analysis**

194 All statistical analyses were performed in RStudio (version 1.1.383, desktop macOS, RStudio  
195 Inc., Boston, Massachusetts, USA). Behaviours were pooled into three categories to address  
196 some low counts. These categories were: "Aroused\_S for behaviours" indicating arousal

197 during stir-up, “Unresolved” for behaviours in the catching pen that may indicate the  
198 greyhound was still fixated on the unattainable lure or expressing frustration, and “Teaser”  
199 for behaviours in the catching pen at Richmond that were related to interacting with the  
200 teasers on bungee lines. The frequency of behaviour recordings both in the catching pen and  
201 in the stir-up were rarely more than 5 counts. The only exception was barking, which is  
202 energetically a much less costly behaviour and is also much quicker to perform than other  
203 behaviours in the ethograms. All behaviours were scaled using the max-min method to a  
204 scale of 0-5 counts to avoid the inflation of results in dogs prone to vocalisation. Counts for  
205 pooled behaviours were then rounded to the nearest whole number to allow for a negative  
206 binomial model to be fitted. This step was relevant only for Aroused\_S behaviours, as  
207 behaviours in other categories did not need to be scaled.

208 An ordinal linear regression model was used to determine factors influencing performance.  
209 Generalised linear models with a quasi-poisson distribution due to over-dispersion in count  
210 data were used from the lme4 package using the glm function in RStudio to determine factors  
211 that have a significant effect on Aroused\_S behaviours and Mean ET Before races and Mean  
212 ET After races. The final models were built using the stepwise method and the AIC number  
213 to determine the model of best fit.

214 Pearson’s Correlation tests using the cor function were performed on factors that were not  
215 included in models or for which models were difficult to resolve.

## 216 **Results**

### 217 **Tracks**

218 Track configuration in terms of where the kennel block, stir-up yard and catching pen were  
219 located in relation to the track differed between tracks, as summarised in Table 3.

220

| Track          | Kennels to stir-up (m) | Kennels to track (m) | Stir-up to track (m) | Catching pen to kennels (m) | Catching pen to stir-up (m) |
|----------------|------------------------|----------------------|----------------------|-----------------------------|-----------------------------|
| Richmond       | 5                      | 34                   | 18                   | 140                         | 123                         |
| Wentworth Park | 1                      | 8                    | 1                    | 5                           | 2                           |
| Gosford        | 17                     | 28                   | 3                    | 170                         | 150                         |

221 **Table 3.** Distances in metres between features of each race track in the study.

222

### 223 Performance

224 The final ordinal linear regression model on greyhound performance included the factors  
225 mean eye temperature before the race (MeanETBefore) mean eye temperature after the race  
226 (MeanETAAfter), dog age (Age), start box number (Box), number of dogs in the race (Field),  
227 the number of days since the dog last raced (Days\_last\_race) and sex of the dog (Sex). It also  
228 included an interaction between Sex and Days\_last\_race. Increasing MeanETAAfter had a  
229 negative effect on performance, as shown in Figure 1 (n=290, Effect = -0.171, s.e. = 0.073, p-  
230 value = 0.019) and increasing age had a negative effect on performance, shown in Figure 2  
231 (n=290, Effect = - 0.395, s.e. = 0.136, p-value = 0.004). On the whole, male dogs performed  
232 better than female dogs (n=290, Effect = 0.752, s.e. = 0.257, p-value = 0.003), but they  
233 performed worse with increasing number of days since they were last raced, as shown in  
234 Figure 3 (n=290, Effect = -0.022, s.e. = 0.010, p-value = 0.023). This is demonstrated further  
235 in Figure 4, which shows the predicted placings of male dogs given weeks since last raced  
236 when all other factors are held constant. The probabilities associated with those predictions  
237 are shown on the y-axis. These figures were obtained from the same ordinal model run on a  
238 subset of the original data containing only male dogs.

239 Box 1 showed the strongest association with good performance while, in comparison, Boxes  
240 4, 5 and 7 had a significantly negative effect on performance (see Table 4 for figures). Figure  
241 5 shows the probability of placings from each starting box. The other factors did not have a

242 statistically significant effect on performance, but their presence improved the model  
 243 according to the AIC. The results of this model are shown in Table 3.

| <b>Term</b>                | <b>Effect</b> | <b>S.E.</b>  | <b>p-value</b> |
|----------------------------|---------------|--------------|----------------|
| Mean ET Before             | 0.011         | 0.063        | 0.858          |
| <b>Mean ET After</b>       | <b>-0.171</b> | <b>0.073</b> | <b>0.019</b>   |
| <b>Sex (m)</b>             | <b>0.752</b>  | <b>0.257</b> | <b>0.003</b>   |
| Box2                       | -0.747        | 0.417        | 0.073          |
| Box3                       | -0.832        | 0.446        | 0.062          |
| <b>Box4</b>                | <b>-1.220</b> | <b>0.425</b> | <b>0.004</b>   |
| <b>Box5</b>                | <b>-1.023</b> | <b>0.455</b> | <b>0.025</b>   |
| Box6                       | -0.820        | 0.424        | 0.053          |
| <b>Box7</b>                | <b>-1.125</b> | <b>0.417</b> | <b>0.007</b>   |
| Box8                       | -0.723        | 0.413        | 0.080          |
| <b>Age</b>                 | <b>-0.395</b> | <b>0.136</b> | <b>0.004</b>   |
| Days_last_race             | 0.001         | 0.005        | 0.793          |
| <b>Field</b>               | <b>-0.457</b> | <b>0.174</b> | <b>0.009</b>   |
| <b>Sexm:Days_last_race</b> | <b>-0.022</b> | <b>0.010</b> | <b>0.023</b>   |

244 **Table 4.** Summary of an ordinal linear regression model on performance in racing  
 245 greyhounds. Factors with a significant effect on performance appear in bold. Mean eye  
 246 temperature 15-minutes after the race, Start Boxes 4, 5 and 7, increasing age, and days since  
 247 last raced for males only had a negative impact on performance. Male dogs performed better  
 248 than female dogs. The number of dogs in each race (Field) was included in the model to  
 249 account for the possible effects of there being fewer dogs in the race.

250

251 **Aroused behaviours**

252 The negative binomial model on the frequency of aroused behaviour was constructed in the  
 253 same manner as the ordinal model. This model included mean eye temperature before and  
 254 after the race, race distance (Distance), racetrack (Track), sex, and Days\_last\_race. A  
 255 summary of these results is shown in Table 5. Increasing race distance had a negative effect  
 256 on the frequency of aroused behaviours in the stir-up (n = 290, Effect = -0.004, s.e. = 0.002,  
 257 p-value = 0.031), and the race being held at Wentworth Park had a positive effect on the  
 258 frequency of aroused behaviours in the stir-up (compared to Gosford) (n = 290, Effect =  
 259 1.255, s.e. = 0.380, p-value = 0.001). There was a non-significant trend for increasing number  
 260 of days since last raced to be associated with reduced Aroused\_S behaviour counts.

| Term                     | Effect        | S.E.         | p-value      |
|--------------------------|---------------|--------------|--------------|
| (Intercept)              | -0.204        | 4.733        | 0.966        |
| Mean ET Before           | -0.052        | 0.092        | 0.574        |
| Mean ET After            | 0.094         | 0.093        | 0.310        |
| Sex (m)                  | 0.198         | 0.263        | 0.450        |
| <b>Distance</b>          | <b>-0.004</b> | <b>0.002</b> | <b>0.031</b> |
| Track (Richmond)         | 0.587         | 0.400        | 0.142        |
| <b>Track (Wentworth)</b> | <b>1.255</b>  | <b>0.380</b> | <b>0.001</b> |
| Days_last_race           | -0.015        | 0.008        | 0.071        |

261 **Table 5:** Summary of a negative binomial linear regression model of aroused behaviour  
 262 during stir-up (immediately before racing). Statistically significant results are shown in bold.  
 263 Increasing race distance had a negative effect on the frequency of aroused behaviours. More  
 264 aroused behaviours were observed at the Wentworth Park track than at the Gosford track.

265 **Mean eye temperature**

266 The generalised linear model for Mean ET Before races contained the terms Track, Sex, Race  
 267 and Aroused\_S, and a summary of the model is shown in Table 6. Track had a powerful  
 268 effect on Mean ET Before, with both Gosford and Wentworth having a strong, positive  
 269 effect, as shown in Figure 5 (n = 442, Effect = 1.910, s.e. = 0.152, p-value = 0.001; Effect =  
 270 1.595, s.e. = 0.159, p < 0.001 for Gosford and Wentworth respectively). Increasing race  
 271 number had a strong, positive effect on Mean ET Before (n = 442, Effect = 0.103, s.e. =  
 272 0.022, p-value < 0.001), s shown in Figure 7. Males had lower Mean ET Before, and Aroused  
 273 behaviours in stir-up had a positive effect on Mean ET Before, but the effect of both factors  
 274 was very small and not statistically significant. A generalised linear model for Mean ET After  
 275 races contained the terms Race, Temperature, Track, Distance, Sex, Aroused\_S and  
 276 Unresolved, and revealed that statistically significant predictors of Mean ET After were  
 277 ambient temperature (n = 310, Effect = 0.149, s.e. = 0.032, p-value < 0.001) and race number  
 278 had a positive effect (n = 310, Effect = 0.071, s.e = 0.027, p = 0.010) (Table 7). A scatter plot  
 279 showing the relationship between ambient temperature and Mean Eye Temperature Before  
 280 the race is shown in Figure 8. Mean Eye Temperature After the race was, as expected,  
 281 influenced by ambient temperature, and the relationship is shown in Figure 9.

| <b>Term</b>              | <b>Effect</b> | <b>S.E.</b>  | <b>p-value</b>    |
|--------------------------|---------------|--------------|-------------------|
| (Intercept)              | 32.676        | 0.185        | < 0.001           |
| <b>Race</b>              | <b>0.103</b>  | <b>0.002</b> | <b>&lt; 0.001</b> |
| <b>Track (Gosford)</b>   | <b>1.910</b>  | <b>0.152</b> | <b>&lt; 0.001</b> |
| <b>Track (Wentworth)</b> | <b>1.595</b>  | <b>0.159</b> | <b>&lt; 0.001</b> |
| Sexm                     | -0.007        | 0.130        | 0.959             |
| Aroused_S                | 0.005         | 0.034        | 0.872             |

282 **Table 6:** Generalised linear model summary for Mean ET Before races. Statistically



283 *significant effects appear in bold. Track and increasing race number both have significant,*  
 284 *positive effects on Mean ET Before races.*

285

| Term               | Estimate     | Std. Error   | P-value          |
|--------------------|--------------|--------------|------------------|
| (Intercept)        | 33.416       | 0.704        | <0.001           |
| <b>Race</b>        | <b>0.071</b> | <b>0.027</b> | <b>0.01</b>      |
| Distance           | -0.001       | 0.001        | 0.258            |
| Sex (m)            | -0.014       | 0.157        | 0.927            |
| Track (Gosford)    | 0.29         | 0.346        | 0.402            |
| Track (Wentworth)  | -0.05        | 0.325        | 0.878            |
| Aroused            | 0.04         | 0.041        | 0.328            |
| Unresolved         | 0.055        | 0.136        | 0.688            |
| <b>Temperature</b> | <b>0.159</b> | <b>0.032</b> | <b>&lt;0.001</b> |

286 **Table 7:** *Generalised linear model summary for Mean ET After races. Statistically significant*  
 287 *effects are in bold. Ambient temperature (Celsius) and increasing race number both have*  
 288 *significant, positive effects on Mean ET After races.*

289

290

291

292

293 **Figure 1:** *The probabilities of different mean eye temperatures 15-minutes after racing for*  
 294 *placing 1<sup>st</sup> through to 8<sup>th</sup> where races include 5-8 dogs. Mean eye temperatures (Celsius) are*  
 295 *shown on the x-axis. Probability of mean eye temperature given placing (1<sup>st</sup>-8<sup>th</sup>) is shown on*  
 296 *y-axis. 95% confidence intervals are shown in shading. There is a higher probability of*

297 *higher mean eye temperature in dogs with poorer placings.*

298

299 **Figure 2.** *The effect of greyhound age (x-axis) on the probability (y-axis) of placing (Place 1-*  
300 *8). 95% confidence intervals shown with shading. Younger dogs were more likely to place*  
301 *favourably (Place 1-4) than older dogs.*

302

303 **Figure 3.** *The effects of days since last raced (x-axis) on the probability of placing (Place 1<sup>st</sup>*  
304 *-8<sup>th</sup>) for females (left column) and males (right column). There was an interaction between*  
305 *sex and days since last raced, with males more likely to place poorly as intervals since last*  
306 *racing increased. 95% confidence intervals shown in shading.*

307

308 **Figure 4.** *Predicted placings of male dogs 1-10 weeks after since last racing. Places with*  
309 *highest probability when all other factors in the ordinal linear regression model are held at*  
310 *their mean are shown on the bars. Error bars show the upper limits and lower limits of*  
311 *predicted probabilities associated with the placings. Thus, there is a predicted loss of 3*  
312 *places between racing male dogs a week after their last race compared to 10 weeks after*  
313 *their last race.*

314

315 **Figure 5.** *The effects of the starting box on the probability of placing 1<sup>st</sup>-8<sup>th</sup> (Performance).*  
316 *Dogs have a higher probability of placing first or second if they start from Box 1. Boxes 4*  
317 *and 5 are associated with an elevated probability of placing 7<sup>th</sup> or 8<sup>th</sup>. 95% confidence*  
318 *intervals shown in shading. Box is on the x-axis and probability given placing (Performance)*  
319 *is on the y-axis.*

320

321

322 **Figure 6:** *Fitted Mean ET Before races at different tracks. MeanETBefore was much lower at*  
323 *Richmond than the other two tracks, suggesting dogs are overall calmer at Richmond*  
324 *racetrack than Wentworth Park or Gosford. Superscripts are assigned to values that are*  
325 *significantly different from one another.*

326

327

328 **Figure 7:** *Predicted Mean ET Before races depending on race number. Mean ET Before*  
329 *races increases as race number increases, indicating greyhounds become increasingly*  
330 *aroused as the race meet progresses. 95% confidence intervals shown with shading.*

331

332 **Figure 8:** *Scatter plot showing relationship between Mean Eye Temperature Before the race*  
333 *and ambient temperature for each track. Ambient temperature was not included in the model*  
334 *to predict Mean Eye Temperature Before because its addition to the model worsened the fit of*  
335 *the model according to the AIC.*

336

337

338 **Figure 9.** *Predicted response of Mean Eye Temperature After the race to ambient*  
339 *temperature across all tracks. Ambient temperature significantly influenced Mean Eye*  
340 *Temperature After the race, but not greyhound performance.*

341

342 There was a significant, negative correlation between Teaser-related behaviour and Mean ET  
343 Before at Richmond track where the teasers were available in the catching pen (n = 166, cor  
344 = -0.140, df = 446, p-value = 0.003). We were unable to resolve a model for the frequency of  
345 Unresolved behaviours in the catching pen or Teaser-related behaviours, which may be due to  
346 low count data combined with multiple factors having a small influence on these behaviours.  
347 However, the frequency of Unresolved behaviours in the catching pen at Richmond racetrack  
348 was dramatically lower (17.1% of starters) compared to Wentworth Park (77.1% of starters)  
349 and Gosford (96% of starters) racetracks.

## 350 **Discussion**

351 This study focused on the behaviour and arousal of racing greyhounds during race-meets, and  
352 the effect of these factors on performance.

### 353 **Eye temperature**

354 Dogs with higher mean eye temperatures after the race were more likely to place in the back  
355 half of the field. Eye surface temperature, as measured by IRT, has been shown to drop in  
356 companion dogs in response to separation from their owners [18], but to increase in response  
357 to anticipation of a reward [16], owner return after separation [18], or being subjected to a  
358 veterinary examination [8]. Previous studies on cattle, horses and chickens have shown a  
359 drop in eye temperature when the animal appears to be in pain, is under restraint, or has been  
360 startled [11,25,26], suggesting that this is consistent with an acute stress response dominated  
361 by activation of the sympathetic nervous system, whereas an increase in ET may be  
362 consistent with a stress response dominated by parasympathetic activation [8]. Anticipation  
363 of reward and veterinary examinations may represent a stress response dominated by the  
364 activation of the parasympathetic nervous system instead of the sympathetic nervous system,  
365 which may represent a more general and less acute stress response. This outcome would be  
366 consistent with the general, non-specific stress of a race meet, kennelling, travel, and

367 environmental noise. However, if generalised stress and/or anxiety related to the race meet  
368 environment were influencing performance, this should have been detectable through a  
369 significant increase in mean eye temperatures before the race as performance decreased. That  
370 pattern existed in the current study, but was not statistically significant.

371 . Sampling in the kennels prior to racing would likely provide a better comparison of before  
372 and after race as the act of taking the dogs out of the kennels may elevate their arousal.  
373 However, this was not permitted by the racing officials. Under the rules of racing [3],  
374 greyhounds must remain in the kennels for 15 minutes before they can be taken home, so the  
375 IR thermograph needed to be taken at this 15-minute juncture to allow the greyhounds to cool  
376 down so as to minimise the effects of body temperature on eye surface temperature, while  
377 still obtaining thermographs before the greyhounds were removed from their kennels.

378

### 379 **Mean ET After races**

380 Higher mean eye temperatures after the race was associated with poorer performance, but it is  
381 difficult to separate the effects of physical exertion in racing from the effects of emotional  
382 state before and during the races. Studies have found that ET increases in response to  
383 physical exercise in dogs and horses [12,13,17,27], but the form of exercise in these studies  
384 was prolonged rather than the short intensity of sprint races in the current study. Breed  
385 differences in ET in response to physical exercise has been reported in horses [12] and dogs  
386 [17]. This is of particular interest in horses, as Bartolomé et al. [12] conducted their study on  
387 horses at a show-jumping competition, and suggested that some horses prone to higher  
388 emotional reactivity showed a stronger change in ET after performing. The horse breeds  
389 studied were more similar in size than the Labrador retrievers versus the beagles used in  
390 Zanghi et al.'s study [17], and the show-jumping competition more closely resembles the

391 current racemeets than the free play-bouts studied by Zanghi et al. [17]. Thus, it is possible  
392 that the current mean eye temperatures after racing are indicative of a stronger stress response  
393 to racing, and the disruptive effects of over-arousal on performance.

394 An alternative possible reason for the inverse relationship between mean eye temperatures  
395 after the race and performance is that increased mean eye temperature after racing is more  
396 indicative of higher core body temperature than directly of emotional state. A previous study  
397 suggested it takes at least 30-minutes for dogs' core body temperature to return to baseline  
398 after 30-minutes of exercise [17]. In the current study, it was not possible to collect IRT  
399 images reliably more than 15-minutes after racing at the racetracks due to owners removing  
400 them from kennels and transporting them home. As such, the negative relationship between  
401 performance and observed mean eye temperatures after the race may be a result of dogs that  
402 perform poorly having to expend more effort to compete in the race than dogs that perform  
403 well, and thus having higher core body temperatures and mean eye temperatures after the  
404 race.

#### 405 **Ambient temperature**

406 Ambient temperature was a significant predictor of mean eye temperatures after the race, but  
407 not mean eye temperatures before the race. This variable was not included in the performance  
408 model because it compromised model fit. Greyhounds are held in temperature-controlled  
409 kennels before their race, but extreme ambient temperatures may influence IRT images after  
410 races, and this may need to be treated with caution if the industry elects to use IRT in future.  
411 Further research into eye temperatures after highly arousing activities and various intensities  
412 of physical exercise will reveal the utility and limitations of IR images in assessing emotional  
413 states in dogs of various breeds and levels of fitness.

414 **Race number**

415 There was a statistically significant, positive effect of race number on mean eye temperatures  
416 before the races, suggesting that greyhounds at the race-meet grew increasingly aroused as  
417 the race-meet progressed. All greyhounds racing must be kennelled 30 minutes before the  
418 first race. They are undisturbed in the time between kennelling closing and the first race, but  
419 once races are underway, a steady stream of trainers enter the kennels to collect dogs and  
420 return dogs that have just raced. The kennelled dogs are therefore exposed to ongoing  
421 disturbance, and also likely hear arousing auditory stimuli from the course, such as the sound  
422 of the lure moving on the track. Whether the kennels themselves and the noise of unfamiliar  
423 neighbouring dogs within them are a source of distress for greyhounds at race-meets or  
424 whether arousal in kennelled greyhounds rises with each anthropogenic disturbance is unclear  
425 and beyond the scope of the study, but the increase in mean eye temperatures before the races  
426 over the course of the race-meet suggests a continuous rise in arousal. This is unlikely to be  
427 related to the intensity of competition, as prize money does not routinely increase with each  
428 race. Greyhounds cannot know when they will be taken out of their kennel for racing, so may  
429 anticipate this occurring every time they are disturbed by the movements of trainers and dogs,  
430 leading to increasing frustration and aroused anticipation when they are not removed.

431 **Aroused behaviours in stir-up**

432 A previous study found that horses displaying behaviour indicative of higher arousal  
433 immediately prior to racing performed more poorly than horses that appeared calmer [5]. We  
434 did not find such a relationship either between mean eye temperatures before the race or the  
435 frequency of aroused behaviours in the stir-up and performance in the racing greyhounds in  
436 this study. Indeed, there was no relationship among the behaviours in the current ethogram  
437 thought to indicate emotional arousal, mean eye temperature before or after the race, and  
438 performance. Aroused behaviours in stir-up were best explained by race distance and race

439 venue, with fewer behaviours indicative of arousal being observed before longer race  
440 distances, and more of such behaviours at Wentworth Park racetrack than the other tracks.  
441 These results call into question both the validity of ethograms in assessing arousal at race  
442 meetings, and whether greyhounds encounter elevated arousal at least several minutes before  
443 the mandatory stir-up. It was not feasible to collect IRT images of greyhounds during or  
444 immediately following stir-up due to the pressing schedules of race meetings, so it is possible  
445 many greyhounds were not undergoing heightened arousal when the pre-race IRT images  
446 were being taken. Alternatively, the behaviour of dogs during stir-up may be poor indicators  
447 of arousal. Dogs that express their arousal overtly with easily detectable behaviours may be  
448 no more aroused than dogs that are passive during stir-up. Any difference in behaviours may  
449 not directly reflect a difference in arousal level.

#### 450 **Age and experience**

451 Younger dogs were more likely to place in the front half of the field than older dogs. This  
452 may be because younger dogs are less likely to be burdened with the effects of previous  
453 injuries or general degenerative changes that may occur with age. In racehorses, studies have  
454 found that the risk of injury increases with age [28,29] and that racing speeds peak [30] or  
455 plateau [31] at approximately 4.5 years of age.

#### 456 **Start box**

457 The box from which dogs started also had a significant impact on their likelihood of placing  
458 favourably, an outcome which is freely acknowledged by track administrators, for  
459 Wentworth Park at least [32]. Box 1 appears to offer an advantage, as noted by The  
460 Greyhound Recorder [33] and, in the current study, Boxes 4, 5 and 7 conferred a significant  
461 disadvantage when compared to Box 1. Greyhounds that prefer to run close to the rail are  
462 likely to perform better regardless of starting box because they must cover less ground over  
463 the course of the race than greyhounds that prefer to run on the outside of the pack. As such,



464 greyhounds that prefer to run close to the rail and that also start from Box 1, 2 or 3 are likely  
465 to cover less ground than greyhounds with this preference that start from boxes farther from  
466 the rail. This issue may be best addressed by adopting track safety recommendations for a  
467 lure system that places the lure closer to the centre of the track [34].

#### 468 **Sex of dog**

469 Male greyhounds in the current study were significantly more likely to place favourably than  
470 females. However, this was complicated by an interaction between sex and days since last  
471 raced. Whereas females showed no clear pattern in their performance regardless of how long  
472 it had been since they were last raced, males were more likely to place poorly the longer it  
473 had been since they last raced. There was no significant difference between males and  
474 females in latency since the previous race. The effect of this interaction on performance is  
475 intriguing, but small and difficult to interpret. The significant negative correlation between  
476 mean eye temperatures before the races and latency since the previous race is at odds with a  
477 more intense stress response to the race-meet environment after longer rest periods as a  
478 potential explanation. It is possible that increasing latency since the previous race  
479 compromises race fitness, as extant data on racehorses shows an increase in the likelihood of  
480 sustaining a serious injury during a race with increasing days since last racing [35]. It is also  
481 possible that anticipation of racing is diminished by the lack of recent associations with track-  
482 related stimuli if the dog has not raced for more than a week or so, and this compromises  
483 performance. This is consistent with the current finding of a negative correlation with mean  
484 eye temperatures before the races.

485 Why latency since the previous race should affect male performance more than female  
486 performance is unclear and, to the authors' knowledge, has not previously been reported in  
487 animal performance studies. As always, it is possible this reflects a statistical anomaly, and  
488 that simply increasing the sample size would verify the strength of this relationship.

489 There was no significant difference in mean eye temperatures between sexes before or after  
490 the race and, to the authors' knowledge, no sex differences in response to arousal have  
491 previously been reported in dogs. That said, there may be differences in how individuals of  
492 either sex behave in response to different levels of arousal.

### 493 **Catching pens**

494 One of the goals of the current study was to investigate whether greyhounds in NSW races  
495 were being sufficiently rewarded for racing despite being unable to access the lure at the  
496 conclusion of races. We may assume that if greyhounds are finishing races without any  
497 penalty for failure to chase the lure, they are being sufficiently rewarded for racing at the time  
498 of observing them race. However, recording one race per greyhound cannot demonstrate that  
499 greyhounds are being sufficiently rewarded to continue racing indefinitely. As such, we  
500 searched for signs of frustration in the catching pen upon conclusion of the race. Frustration  
501 has been associated with increased aggression in dogs [36-38], which in turn, may manifest  
502 as an increased risk of attracting a penalty for marring during the race. It is also likely that  
503 what occurs in the catching pen influences a greyhound's emotional associations with racing  
504 in general, and their willingness to enter the catching pen. For the purposes of the current  
505 study, the putative behavioural signs of frustration in the catching pen included jostling  
506 another dog, focusing on the lure gate, and changing directions (included only if the dog  
507 initiated the direction change rather than following another dog that had changed direction).  
508 We found these behaviours in 59.1% of greyhounds. The prevalence of these behaviours is  
509 concerning for two reasons. Firstly, it suggests that, at the end of the race, many greyhounds  
510 are still focused on chasing the lure when that opportunity is taken from them. If they are  
511 going to change direction, greyhounds almost always do so along the inside fence of the track  
512 or catching pen closest to the path of the lure arm, and often do so by orienting the head  
513 towards the lure's direction of travel. The lure in transit makes a loud noise and, after passing

514 the catching pen, may traverse more than half the track before coming to a halt, so the  
515 greyhounds can still hear it while, in the catching pen, unable to chase it. Orienting towards  
516 the lure gate indicates their focus on where they last saw the lure.

### 517 **Frustration in catching pens**

518 The jostling that occurred after nearly every race in the current study is not necessarily an  
519 aggressive expression of frustration. However, the redirection of aggression towards  
520 conspecifics is a recognised consequence of being thwarted in obtaining a goal [see 39].  
521 Other possible causes for this behaviour may be that it is playful in nature, or it may be a  
522 product of up to 8 galloping dogs coming to a halt together in a relatively small space. The  
523 dogs behind those in the lead may take a moment to react to the deceleration of dogs in front  
524 of them, resulting in bunching. Nonetheless, the indications that the greyhounds are still  
525 fixated on the lure raise the prospect that they are not disengaging from their goal even  
526 though they are unable to continue pursuing it. If their goal is to capture the lure, it may be  
527 less important whether they are successful or not and more important that they are not  
528 consistently thwarted in the process, but are instead assisted in disengaging from pursuit. The  
529 effects of frustration on behaviour may include heightened arousal as well as depressive  
530 disappointment [39]. Even if only a small number of greyhounds encounter the most  
531 detrimental effects of frustration in the catching pen, they may be subject to reduced interest  
532 in pursuing the rewards in question; an established response to frustrated non-reward [40].

### 533 **Teasers in catching pen**

534 Only 11.3% of greyhounds at Richmond track were observed showed direct interest in the  
535 teasers in the catching pen. In contrast, 59.1% of greyhounds across all racetracks showed  
536 unresolved behaviours in the catching pen, and this was more than 3 times higher at the  
537 Wentworth Park and Gosford racetracks than at the Richmond racetrack. The distinctly lower

538 incidence of unresolved behaviours in the catching pen at Richmond racetrack may be a  
539 result of the teasers in the catching pen, even though only a small portion of the racing  
540 greyhound population racing at Richmond showed active interest in the teasers. Taken  
541 together with the track effects, it appears Richmond racetrack is, in general, a less arousing  
542 environment than the other two racetracks. It is conceivable that this can be largely attributed  
543 to the presence of teasers, and this prospect warrants further investigation.

#### 544 **Track effects**

545 There was a significant difference among mean eye temperatures, both before and after races,  
546 at different tracks. This between-track difference was strongest with eye temperature before  
547 races, which is the metric most directly reflective of stressors arising in the general racetrack  
548 environment. A general linear model, with mean eye temperatures before races as the  
549 independent variable, revealed a significant positive influence of both Wentworth Park and  
550 Gosford compared to Richmond, with Richmond being associated with the lowest mean eye  
551 temperatures before the race. This may have been influenced by ambient temperature, but the  
552 effect of ambient temperature was neither strong nor significant. This suggests that some  
553 attributes of the Gosford racetrack may be inherently more stressful than Wentworth Park,  
554 and that those of Richmond may be less stressful than those of Wentworth Park. It is unclear  
555 why this may be. It may relate to the design of the kennel facilities, or perhaps even to the  
556 operational behaviour of personnel at the track and how handlers manage and interact with  
557 the dogs, or how quickly they enter the catching pen and restrain the dogs, or it may be the  
558 tracks are particularly attractive to owners of greyhounds that are more or less prone to  
559 distress. As noted in the previous section, this effect may also to some extent be attributable  
560 to the presence of teasers in the catching pen. Further investigation into which track attributes  
561 may influence greyhound stress before racing is important for the integrity of the sport so that

562 vetting, kennelling, and pre-stir-up procedures can be designed to support greyhounds  
563 equitably.

564 There were significantly more behaviours indicative of arousal in the stir-up at Wentworth  
565 Park compared to Gosford. This may reflect the effects of a track design factor or a  
566 operational factor. The track at Wentworth Park has its catching pen adjacent to its stir-up  
567 pen and flush against the track itself, and directly in front of the kennels. In contrast, at  
568 Gosford, the stir-up pen is a considerable distance from the catch-pen, and even farther from  
569 the kennels. Richmond has the greatest distance between the stir-up pen and the track by a  
570 small margin, with the catching pen separated, and the kennels behind the stir-up pen.  
571 Handlers may also behave differently between tracks and may encourage more behaviours  
572 indicative of arousal at some tracks more than at others. This may reflect the handlers  
573 awareness of the available prize money or prestige of the races, the importance of a particular  
574 day of the week on which the races are held, or it may be entirely sub-conscious.

## 575 **Conclusions**

576 The need to understand behavioural wastage in racing greyhounds is clear. Ambient  
577 temperature, race number, age and experience, start box, sex of dog, (frustration and teasers)  
578 in catching pens and track effects all affect the performance of greyhounds on tracks.

579 This is the first published study of racing greyhound behaviour at race-meets and the first,  
580 for any racing code, to use IRT at racetracks to assess arousal. The results describe modest  
581 relationships between eye temperature and performance, but these effects are significant and  
582 may assist in the development of more detailed studies to identify specific factors that  
583 compromise performance and establish how they can be modified to reduce their negative  
584 effects. IRT before races may be more revealing than IRT after races due to the influence of  
585 core body temperature that may reflect the legacy effects of physical effort more than arousal,

586 and the influence of ambient temperature. Attempts to use IRT before races bring significant  
587 timing and logistical challenges, but this study showed there is promise in eye temperature  
588 measurements before races to reveal the effects of experience at racetracks in the long- and  
589 short-term on behaviour and performance. For clearer results, it would be worthwhile  
590 investigating how IRT images may be collected closer to the races

591 This study also offers insights into how individuals within the racing greyhound population  
592 respond differently to the anticipation of racing, and how this might correlate with their  
593 preferences for rewards (e.g. teaser or lure) upon conclusion of any given race. Clearly, the  
594 use of teasers in the catching pen and the track effects on behaviour and arousal are both  
595 areas that merit further research to makes race-meets optimally arousing for racing  
596 greyhounds, and to improving reward availability and disengagement from the lure at the end  
597 of race. The large percentage of dogs t showing signs of frustration and continuing to search  
598 for the lure when in the catching pen raises concern for both the physical and emotional  
599 wellbeing of greyhounds. The catching pen system has been in operation for many years, but  
600 may not support all racing greyhounds equitably in avoiding wastage. The period during  
601 which greyhounds are kennelled before their race may contribute to their stress at race-meets,  
602 so any means by which kennelling time can be reduced, especially for greyhounds in races  
603 late in the days' program, are worth further investigation and suitable trials.

## 604 **References**

- 605 1. McHugh M. Special Commission of Inquiry into the Greyhound Racing Industry  
606 in New South Wales. State of NSW; 2016 Jun pp. 1–269. Report No.: 1.
- 607 2. Starling MJ, McGreevy PD. Surveys on racing greyhound training practices in  
608 Australia. Sydney, Australia: Greyhound Racing NSW; 2017 Mar.
- 609 3. Greyhounds Australasia. Greyhounds Australasia Rules. 2016. pp. 1–75.
- 610 4. Cobb ML, Branson N, McGreevy PD, Bennett PC, Rooney NJ, Magdalinski T,  
611 et al. REVIEW & ASSESSMENT OF BEST PRACTICE. Working Dog  
612 Alliance Australia; 2015 Aug pp. 1–163.

- 613 5. Hutson GD, Haskell MJ. Pre-race behaviour of horses as a predictor of race  
614 finishing order. *APPL ANIM BEHAV SCI*. 1997;53: 231–248.  
615 doi:10.1016/S0168-1591(96)01162-8
- 616 6. Noteboom JT, Fleshner M, Enoka RM. Activation of the arousal response can  
617 impair performance on a simple motor task. *J Appl Physiol*. 2001;91: 821–831.  
618 doi:10.1152/jappl.2001.91.2.821
- 619 7. Roets A, Van Hiel A. An Integrative Process Approach on Judgment and  
620 Decision Making: The Impact of Arousal, Affect, Motivation, and Cognitive  
621 Ability. *The Psychological Record*. 2011;61: 11.
- 622 8. Travain T, Colombo ES, Heinzl E, Bellucci D, Previde EP, Valsecchi P. Hot  
623 dogs: Thermography in the assessment of stress in dogs (*Canis familiaris*)-A  
624 pilot study. *J VET BEHAV*. Elsevier Inc; 2015;10: 17–23.  
625 doi:10.1016/j.jveb.2014.11.003
- 626 9. Bouwknecht AJ, Olivier B, Paylor RE. The stress-induced hyperthermia  
627 paradigm as a physiological animal model for anxiety: A review of  
628 pharmacological and genetic studies in the mouse. *NEUROSCI BIOBEHAV  
629 REV*. 2007;31: 41–59. doi:10.1016/j.neubiorev.2006.02.002
- 630 10. de Lima V, Piles M, Rafel O, López-Béjar M, Ramón J, Velarde A, et al. Use of  
631 infrared thermography to assess the influence of high environmental temperature  
632 on rabbits. *Research in Veterinary Science*. Elsevier Ltd; 2013;95: 802–810.  
633 doi:10.1016/j.rvsc.2013.04.012
- 634 11. Dai F, Cogi NH, Heinzl EUL, Costa ED, Canali E, Minero M. Validation of a  
635 fear test in sport horses using infrared thermography. *J VET BEHAV*. Elsevier  
636 Inc; 2015;10: 128–136. doi:10.1016/j.jveb.2014.12.001
- 637 12. Bartolomé E, Sánchez MJ, Molina A, Schaefer AL, Cervantes I, Valera M.  
638 Using eye temperature and heart rate for stress assessment in young horses  
639 competing in jumping competitions and its possible influence on sport  
640 performance. *Animal*. Cambridge University Press; 2013;7: 2044–2053.  
641 doi:10.1017/S1751731113001626
- 642 13. Valera M, Bartolomé E, Sánchez MJ, Molina A, Cook N, Schaefer A. Changes  
643 in Eye Temperature and Stress Assessment in Horses During Show Jumping  
644 Competitions. *Journal of Equine Veterinary Science*. Elsevier Inc; 2012;32: 827–  
645 830. doi:10.1016/j.jevs.2012.03.005
- 646 14. Stewart M, Stratton RB, Beausoleil NJ, Stafford KJ, Worth GM, Waran NK.  
647 Assessment of positive emotions in horses: Implications for welfare and  
648 performance. *J VET BEHAV*. Elsevier Inc; 2011;6: 296.  
649 doi:10.1016/j.jveb.2011.05.014
- 650 15. Fenner K, Yoon S, White P, Starling M, McGreevy P. The Effect of Noseband  
651 Tightening on Horses' Behavior, Eye Temperature, and Cardiac Responses.  
652 Munderloh UG, editor. *PLOS ONE*. 2016;11: e0154179–20.  
653 doi:10.1371/journal.pone.0154179

- 654 16. Travain T, Colombo ES, Grandi LC, Heinzl E, Pelosi A, Previde EP, et al. How  
655 good is this food? A study on dogs' emotional responses to a potentially pleasant  
656 event using infrared thermography. *PHYSIOL BEHAV.* Elsevier Inc; 2016;159:  
657 80–87. doi:10.1016/j.physbeh.2016.03.019
- 658 17. Zanghi BM. Eye and Ear Temperature Using Infrared Thermography Are  
659 Related to Rectal Temperature in Dogs at Rest or With Exercise. *FRONT VET*  
660 *SCI.* 2016;3: R180–9. doi:10.3389/fvets.2016.00111
- 661 18. Riemer S, Assis L, Pike TW, Mills DS. Dynamic changes in ear temperature in  
662 relation to separation distress in dogs. *PHYSIOL BEHAV.* Elsevier Inc;  
663 2016;167: 86–91. doi:10.1016/j.physbeh.2016.09.002
- 664 19. Part CE, Kiddie JL, Hayes WA, Mills DS, Neville RF, Morton DB, et al.  
665 Physiological, physical and behavioural changes in dogs (*Canis familiaris*) when  
666 kennelled: Testing the validity of stress parameters. *PHYSIOL BEHAV.* Elsevier  
667 Inc; 2014;133: 260–271. doi:10.1016/j.physbeh.2014.05.018
- 668 20. Gillette RL, Angle TC, Sanders JS, DeGraves FJ. An evaluation of the  
669 physiological affects of anticipation, activity arousal and recovery in sprinting  
670 Greyhounds. *APPL ANIM BEHAV SCI.* Elsevier B.V; 2011;130: 101–106.  
671 doi:10.1016/j.applanim.2010.12.010
- 672 21. Broom D. The welfare of livestock during road transport. In: Appleby MC,  
673 Cussen V, Garcés L, Lambert LA, Turner J, editors. *Long Distance Transport*  
674 *and the Welfare of Farm Animals.* London, UK: books.google.com; 2008. pp.  
675 157–181.
- 676 22. Leadon D, Mullins E. Relationship between kennel size and stress in greyhounds  
677 transported short distances by air. *VET REC.* 1991;129: 70–73.  
678 doi:10.1136/vr.129.4.70
- 679 23. Bergeron R, Scott SL, Émond JP, Mercier F, Cook NJ, Schaefer AL. Physiology  
680 and behavior of dogs during air transport. *The Canadian Journal of Veterinary*  
681 *Research.* 2002;: 211–216.
- 682 24. CustomWeather. Syndicated Content for complete global weather coverage  
683 [Internet]. 2019 [cited 27 Feb 2019]. Available: <https://customweather.com>
- 684 25. Edgar JL, Nicol CJ, Pugh CA, Paul ES. Surface temperature changes in response  
685 to handling in domestic chickens. *PHYSIOL BEHAV.* Elsevier Inc; 2013;119:  
686 195–200. doi:10.1016/j.physbeh.2013.06.020
- 687 26. Stewart M, Stafford KJ, Dowling SK, Schaefer AL, Webster JR. Eye  
688 temperature and heart rate variability of calves disbudded with or without local  
689 anaesthetic. *PHYSIOL BEHAV.* 2008;93: 789–797.  
690 doi:10.1016/j.physbeh.2007.11.044
- 691 27. Rizzo M, Arfuso F, Alberghina D, Giudice E, Ganesella M, Piccione G.  
692 Monitoring changes in body surface temperature associated with treadmill  
693 exercise in dogs by use of infrared methodology. *Journal of Thermal Biology.*  
694 Elsevier Ltd; 2017;69: 64–68. doi:10.1016/j.jtherbio.2017.06.007



- 695 28. Anthenill LA, Stover SM, Gardner IA, Hill AE. Risk factors for proximal  
696 sesamoid bone fractures associated with exercise history and horseshoe  
697 characteristics in Thoroughbred racehorses. *AJVR*. 2007;68: 760–771.  
698 doi:10.2460/ajvr.68.7.760
- 699 29. Leleu C, Cotrel C, Courouce-Malblanc A. Relationships between physiological  
700 variables and race performance in French standardbred trotters. *VET REC*.  
701 2005;156: 339–342.
- 702 30. Gramm M, Marksteiner R. The Effect of Age on Thoroughbred Racing  
703 Performance. *J Equine Sci*. 2010;21: 73–79.
- 704 31. Takahashi T. The effect of age on the racing speed of Thoroughbred racehorses.  
705 *J Equine Sci. Japanese Society of Equine Science*; 2015;26: 43–48.  
706 doi:10.1294/jes.26.43
- 707 32. NSW Greyhound Breeders, Owners and Trainers' Association LTD. Wentworth  
708 Park Greyhounds. In: Wentworth Park Greyhounds [Internet]. [cited 9 Feb  
709 2018]. Available: [http://www.wentworthpark.com.au/racing/how-to-bet-on-](http://www.wentworthpark.com.au/racing/how-to-bet-on-greyhounds)  
710 [greyhounds](http://www.wentworthpark.com.au/racing/how-to-bet-on-greyhounds)
- 711 33. Dobbin A. Winning Box Stats... By The Numbers. In: The Greyhound Recorder  
712 [Internet]. 20 Dec 2018 [cited 28 Aug 2019]. Available:  
713 [https://www.thegreyhoundrecorder.com.au/news/winning-box-stats-by-the-](https://www.thegreyhoundrecorder.com.au/news/winning-box-stats-by-the-numbers-21219)  
714 [numbers-21219](https://www.thegreyhoundrecorder.com.au/news/winning-box-stats-by-the-numbers-21219)
- 715 34. Eager D, Hayati H, Mahdavi F, Hossain MI, Stephenson R, Thomas N.  
716 Identifying optimal greyhound track design for greyhound safety and welfare-  
717 Phase II-Progress Report-1 January 2016 to 31 December 2017. 2018.
- 718 35. Hernandez CE, Hinch G, Lea J, Ferguson D, Lee C. Acute stress enhances  
719 sensitivity to a highly attractive food reward without affecting judgement bias in  
720 laying hens. *APPL ANIM BEHAV SCI*. Elsevier B.V; 2015;163: 135–143.  
721 doi:10.1016/j.applanim.2014.12.002
- 722 36. Borchelt PL. Aggressive behavior of dogs kept as companion animals:  
723 Classification and influence of sex, reproductive status and breed. *Applied*  
724 *Animal Ethology*. Elsevier; 1983;10: 45–61. doi:10.1016/0304-3762(83)90111-6
- 725 37. Reisner IR. Differential diagnosis and management of human-directed  
726 aggression in dogs. *VET CLIN NORTH AM SMALL ANIM PRACT*. 2003;33:  
727 303–320.
- 728 38. Luescher AU, Reisner IR. Canine Aggression Toward Familiar People: A New  
729 Look at an Old Problem. *Veterinary Clinics of North America: Small Animal*  
730 *Practice*. 2008;38: 1107–1130. doi:10.1016/j.cvsm.2008.04.008
- 731 39. Klinger E, 1975. Consequences of commitment to and disengagement from  
732 incentives. *Psychological Review*. 1975;82.
- 733 40. Carver CS. Negative Affects Deriving From the Behavioral Approach System.  
734 *Emotion*. 2004;4: 3–22. doi:10.1037/1528-3542.4.1.3

735

736

737 **S1 Figure Text:** Sketches of the three racing tracks in the study with kennels (a), stir-up yard  
738 (b) and catching pen (c) marked to show relative location of track features.

MeanETAAfter effect plot

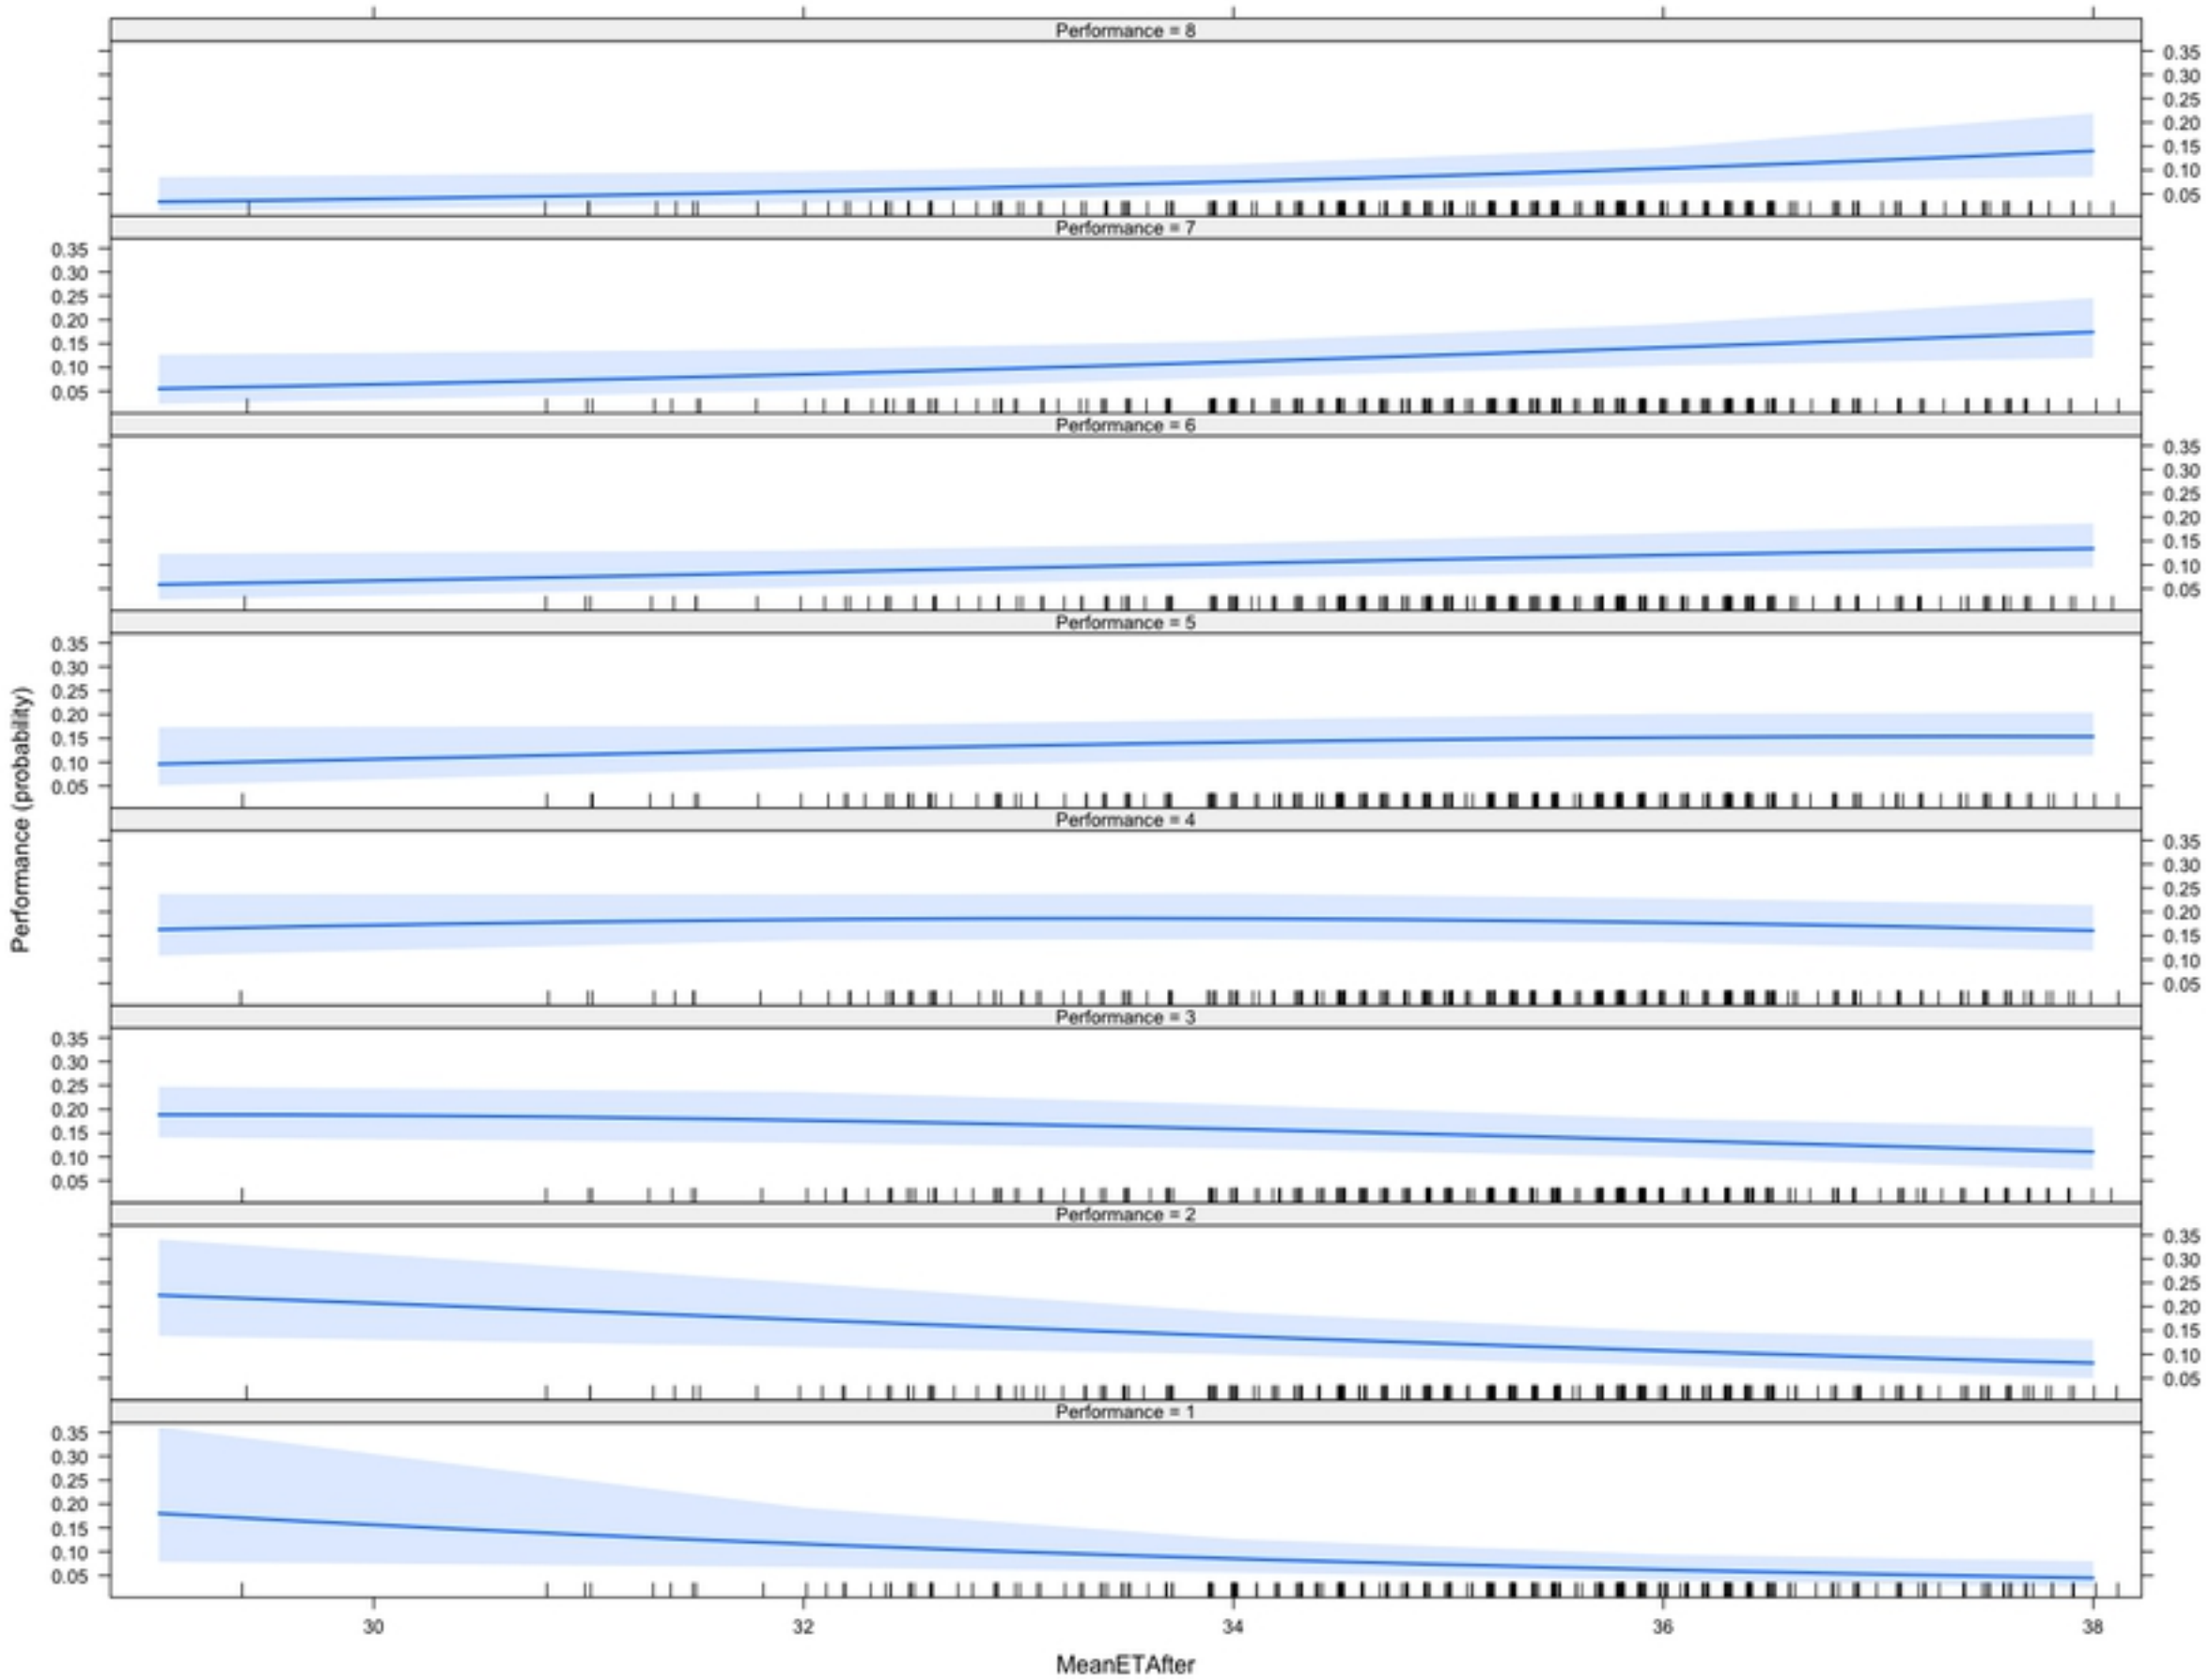

Figure 1

Age effect plot

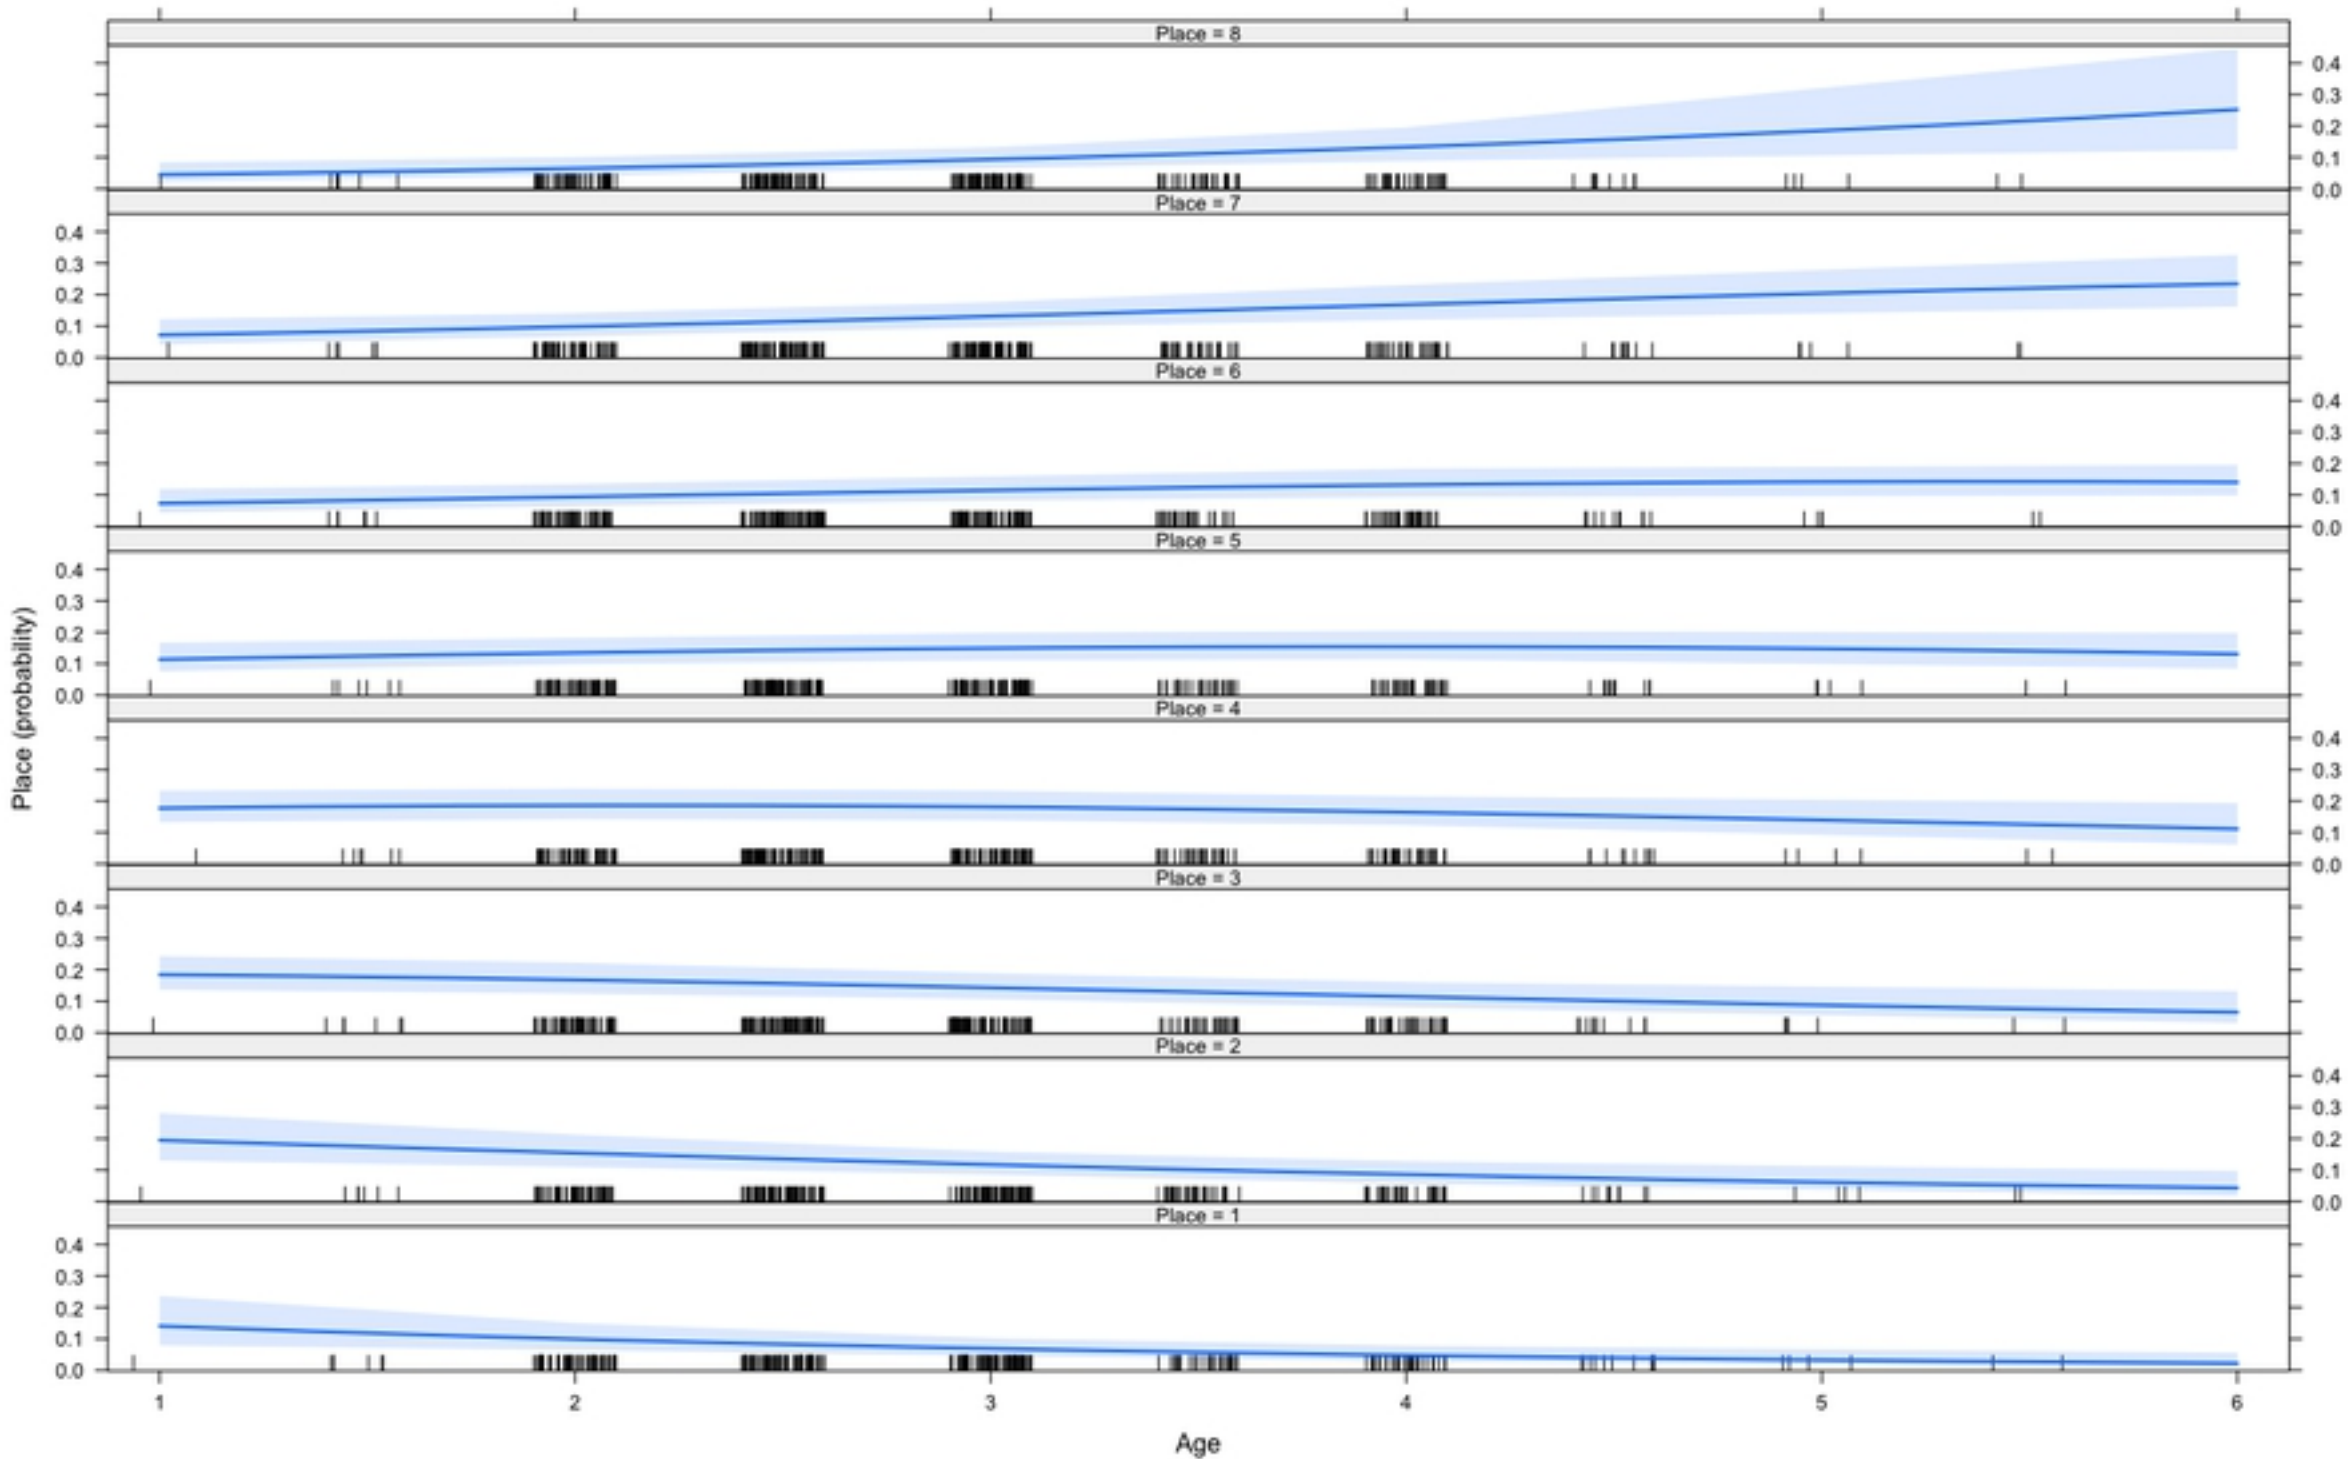

Figure 2

Days\_last\_race\*Sex effect plot

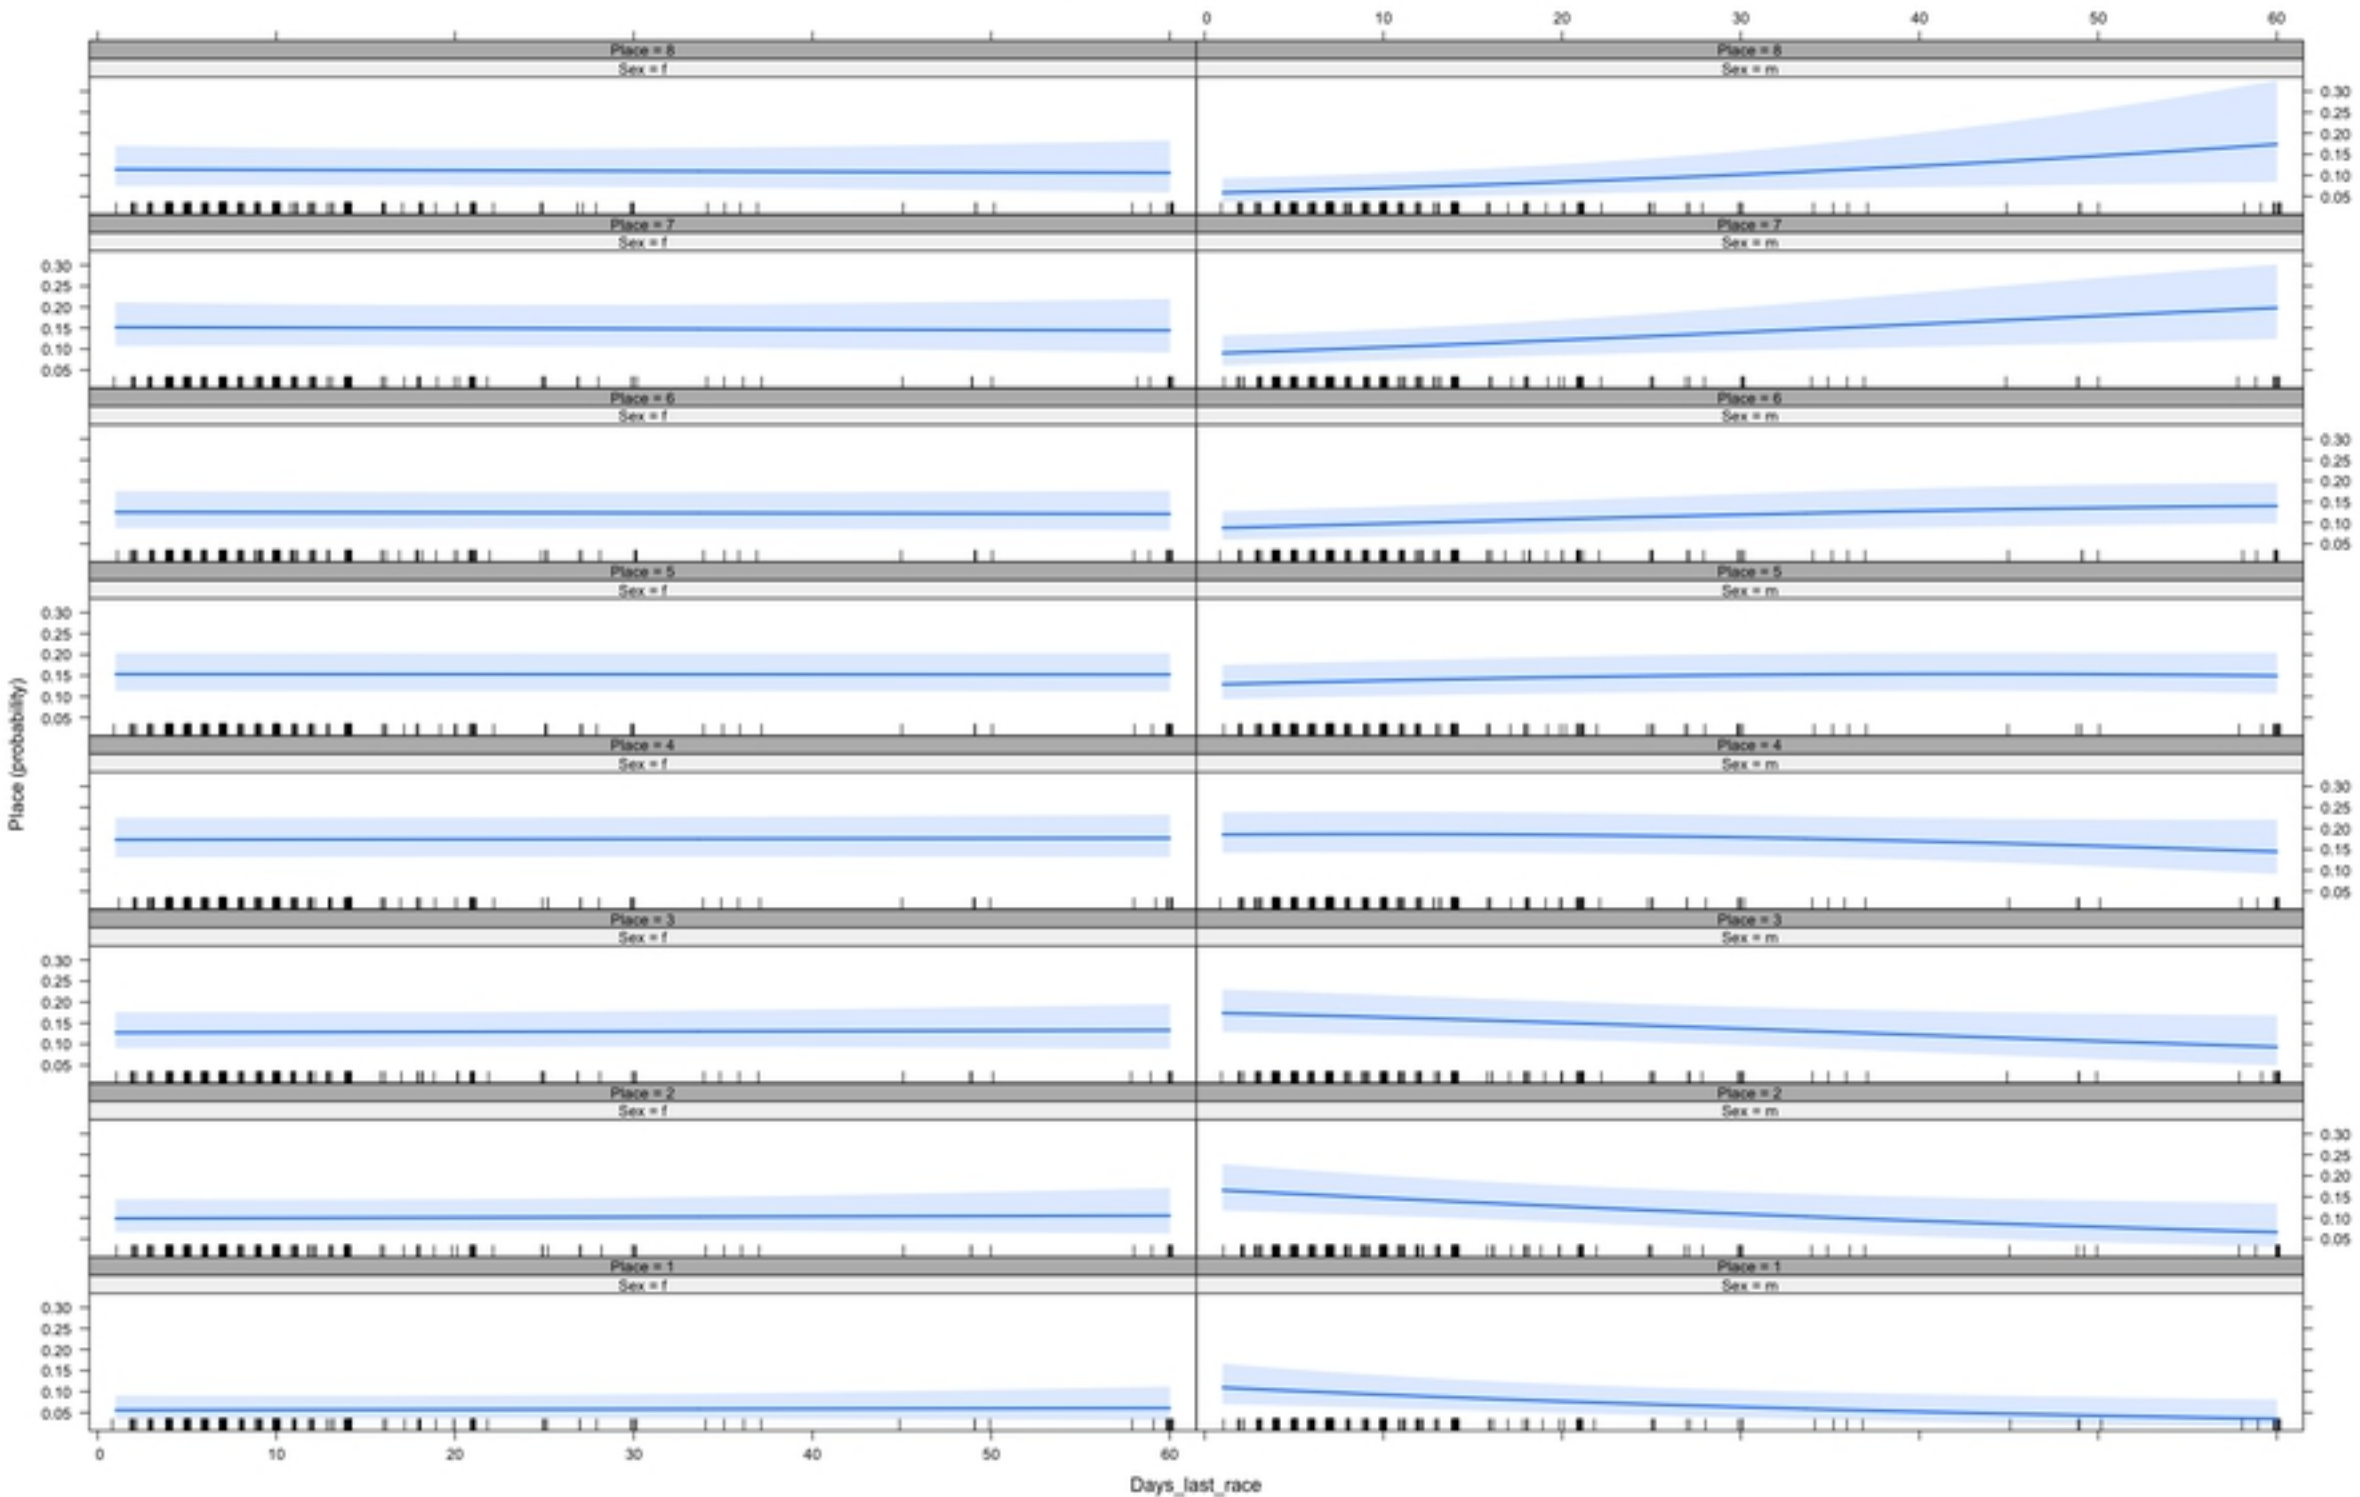

Figure 3

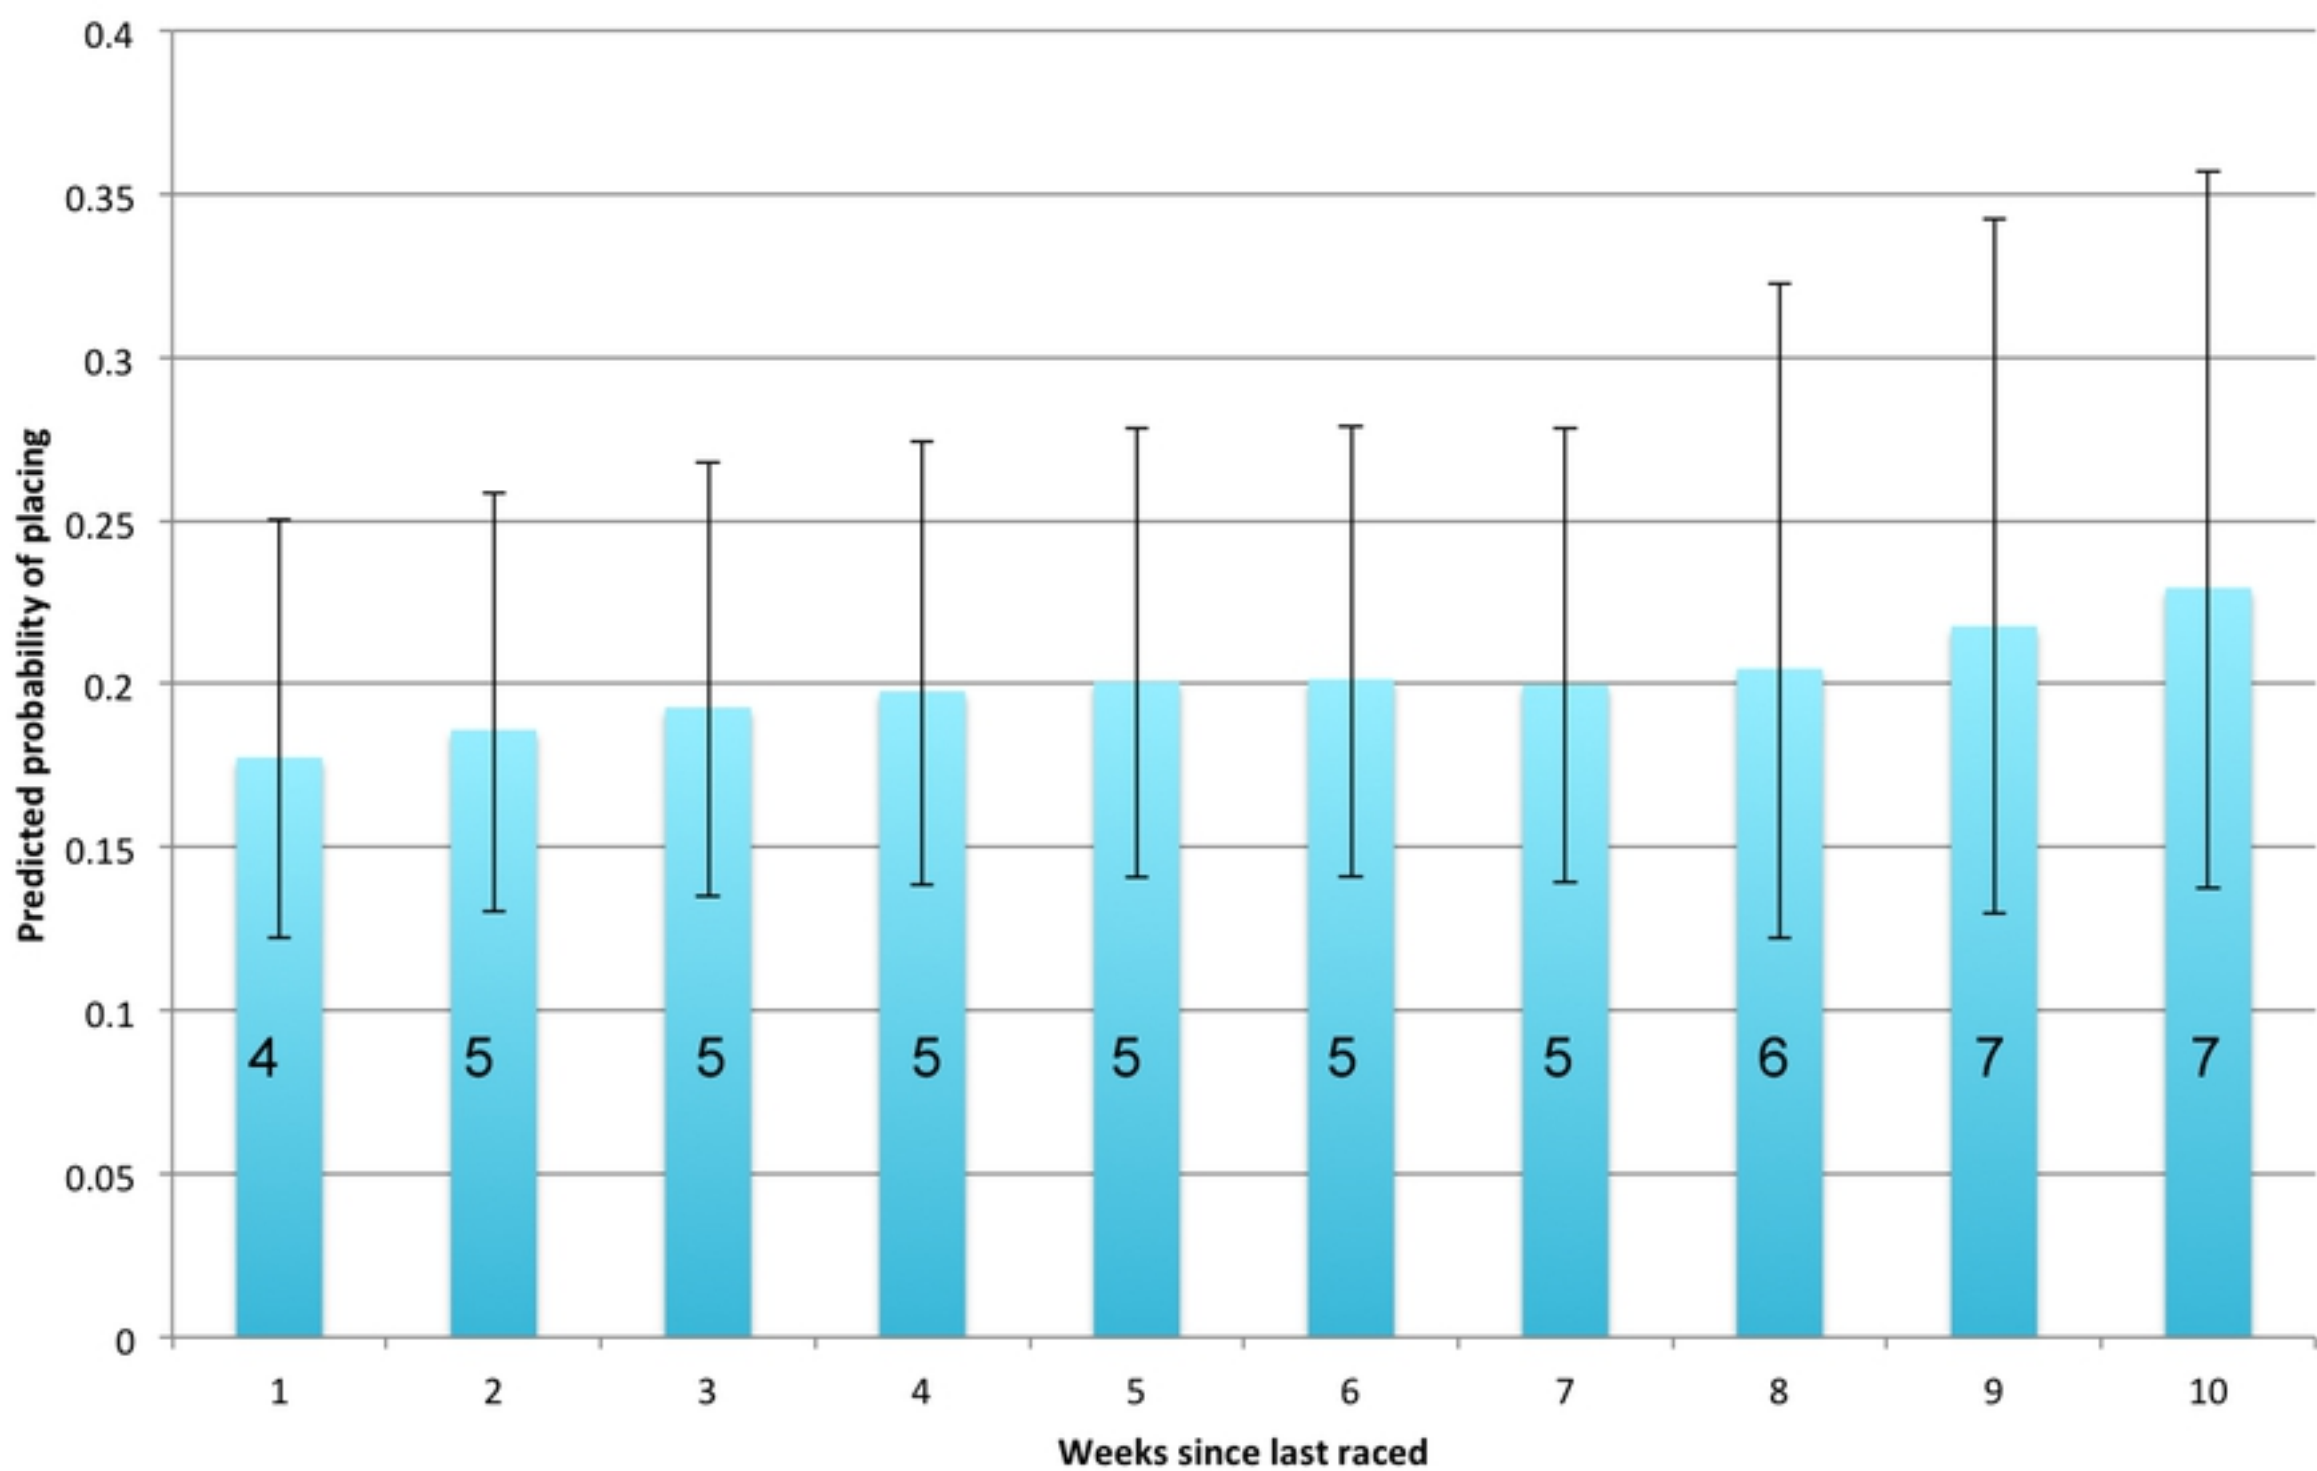

Figure 4

Box effect plot

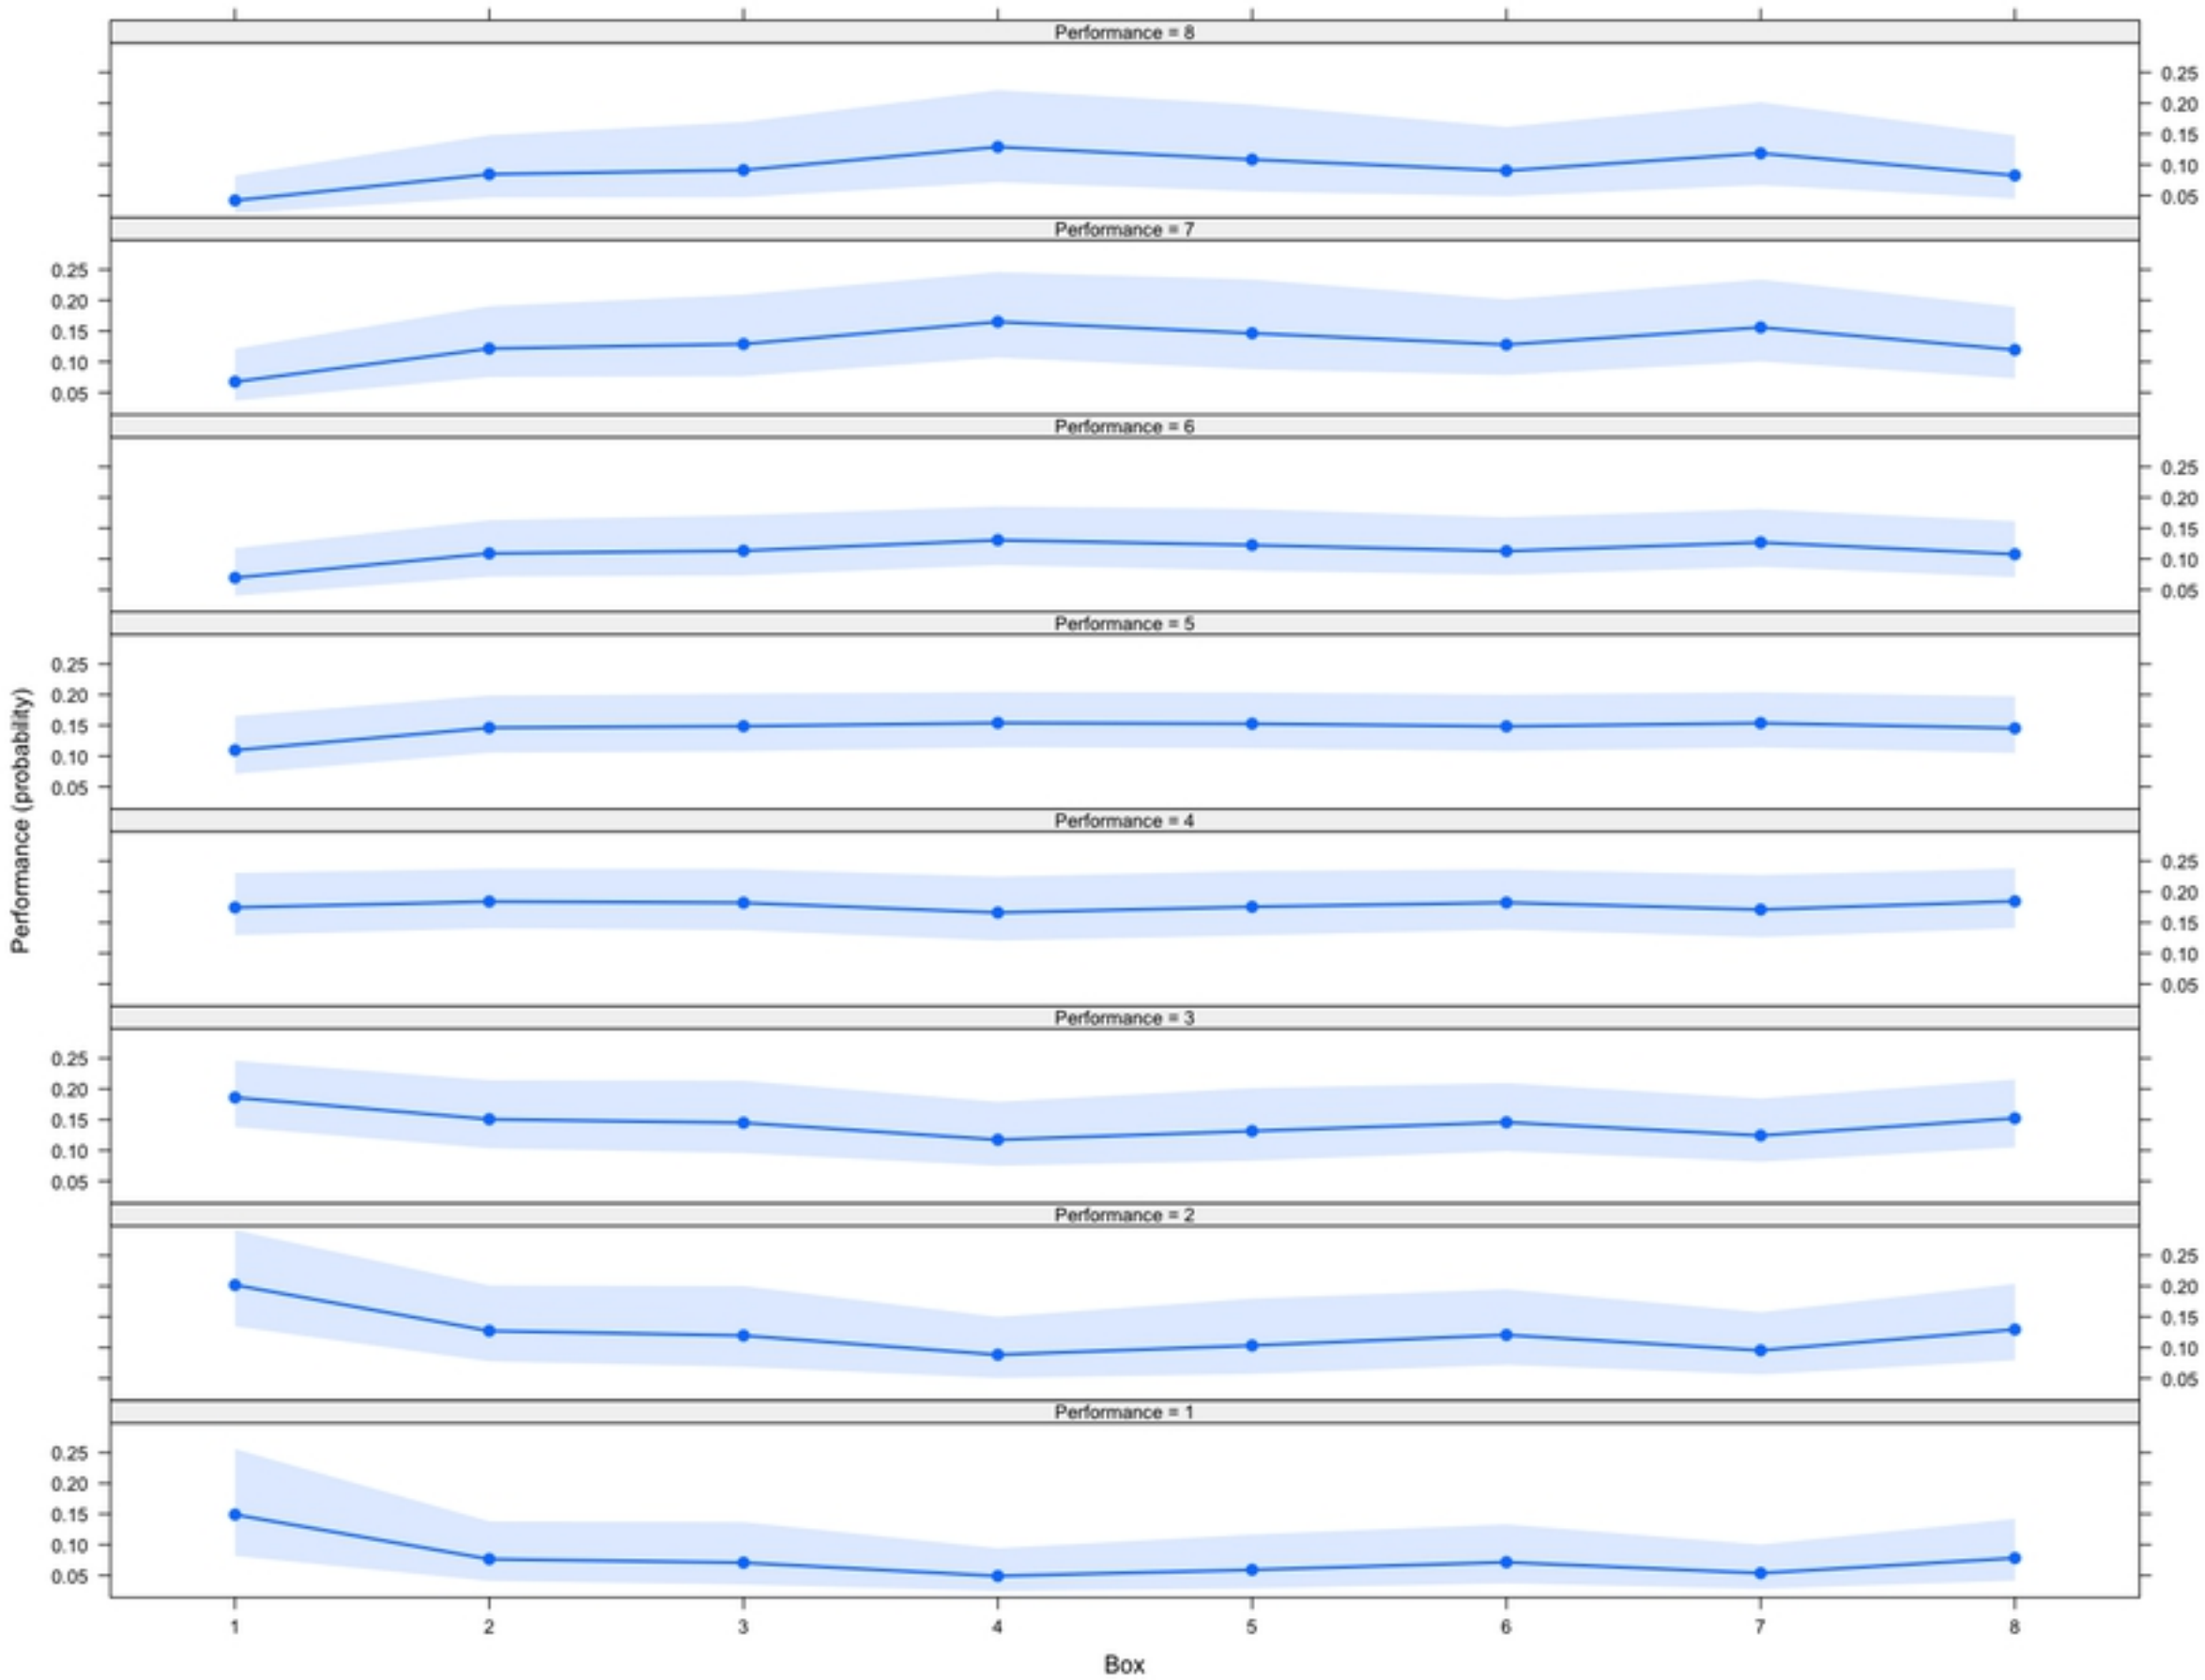

Figure 5

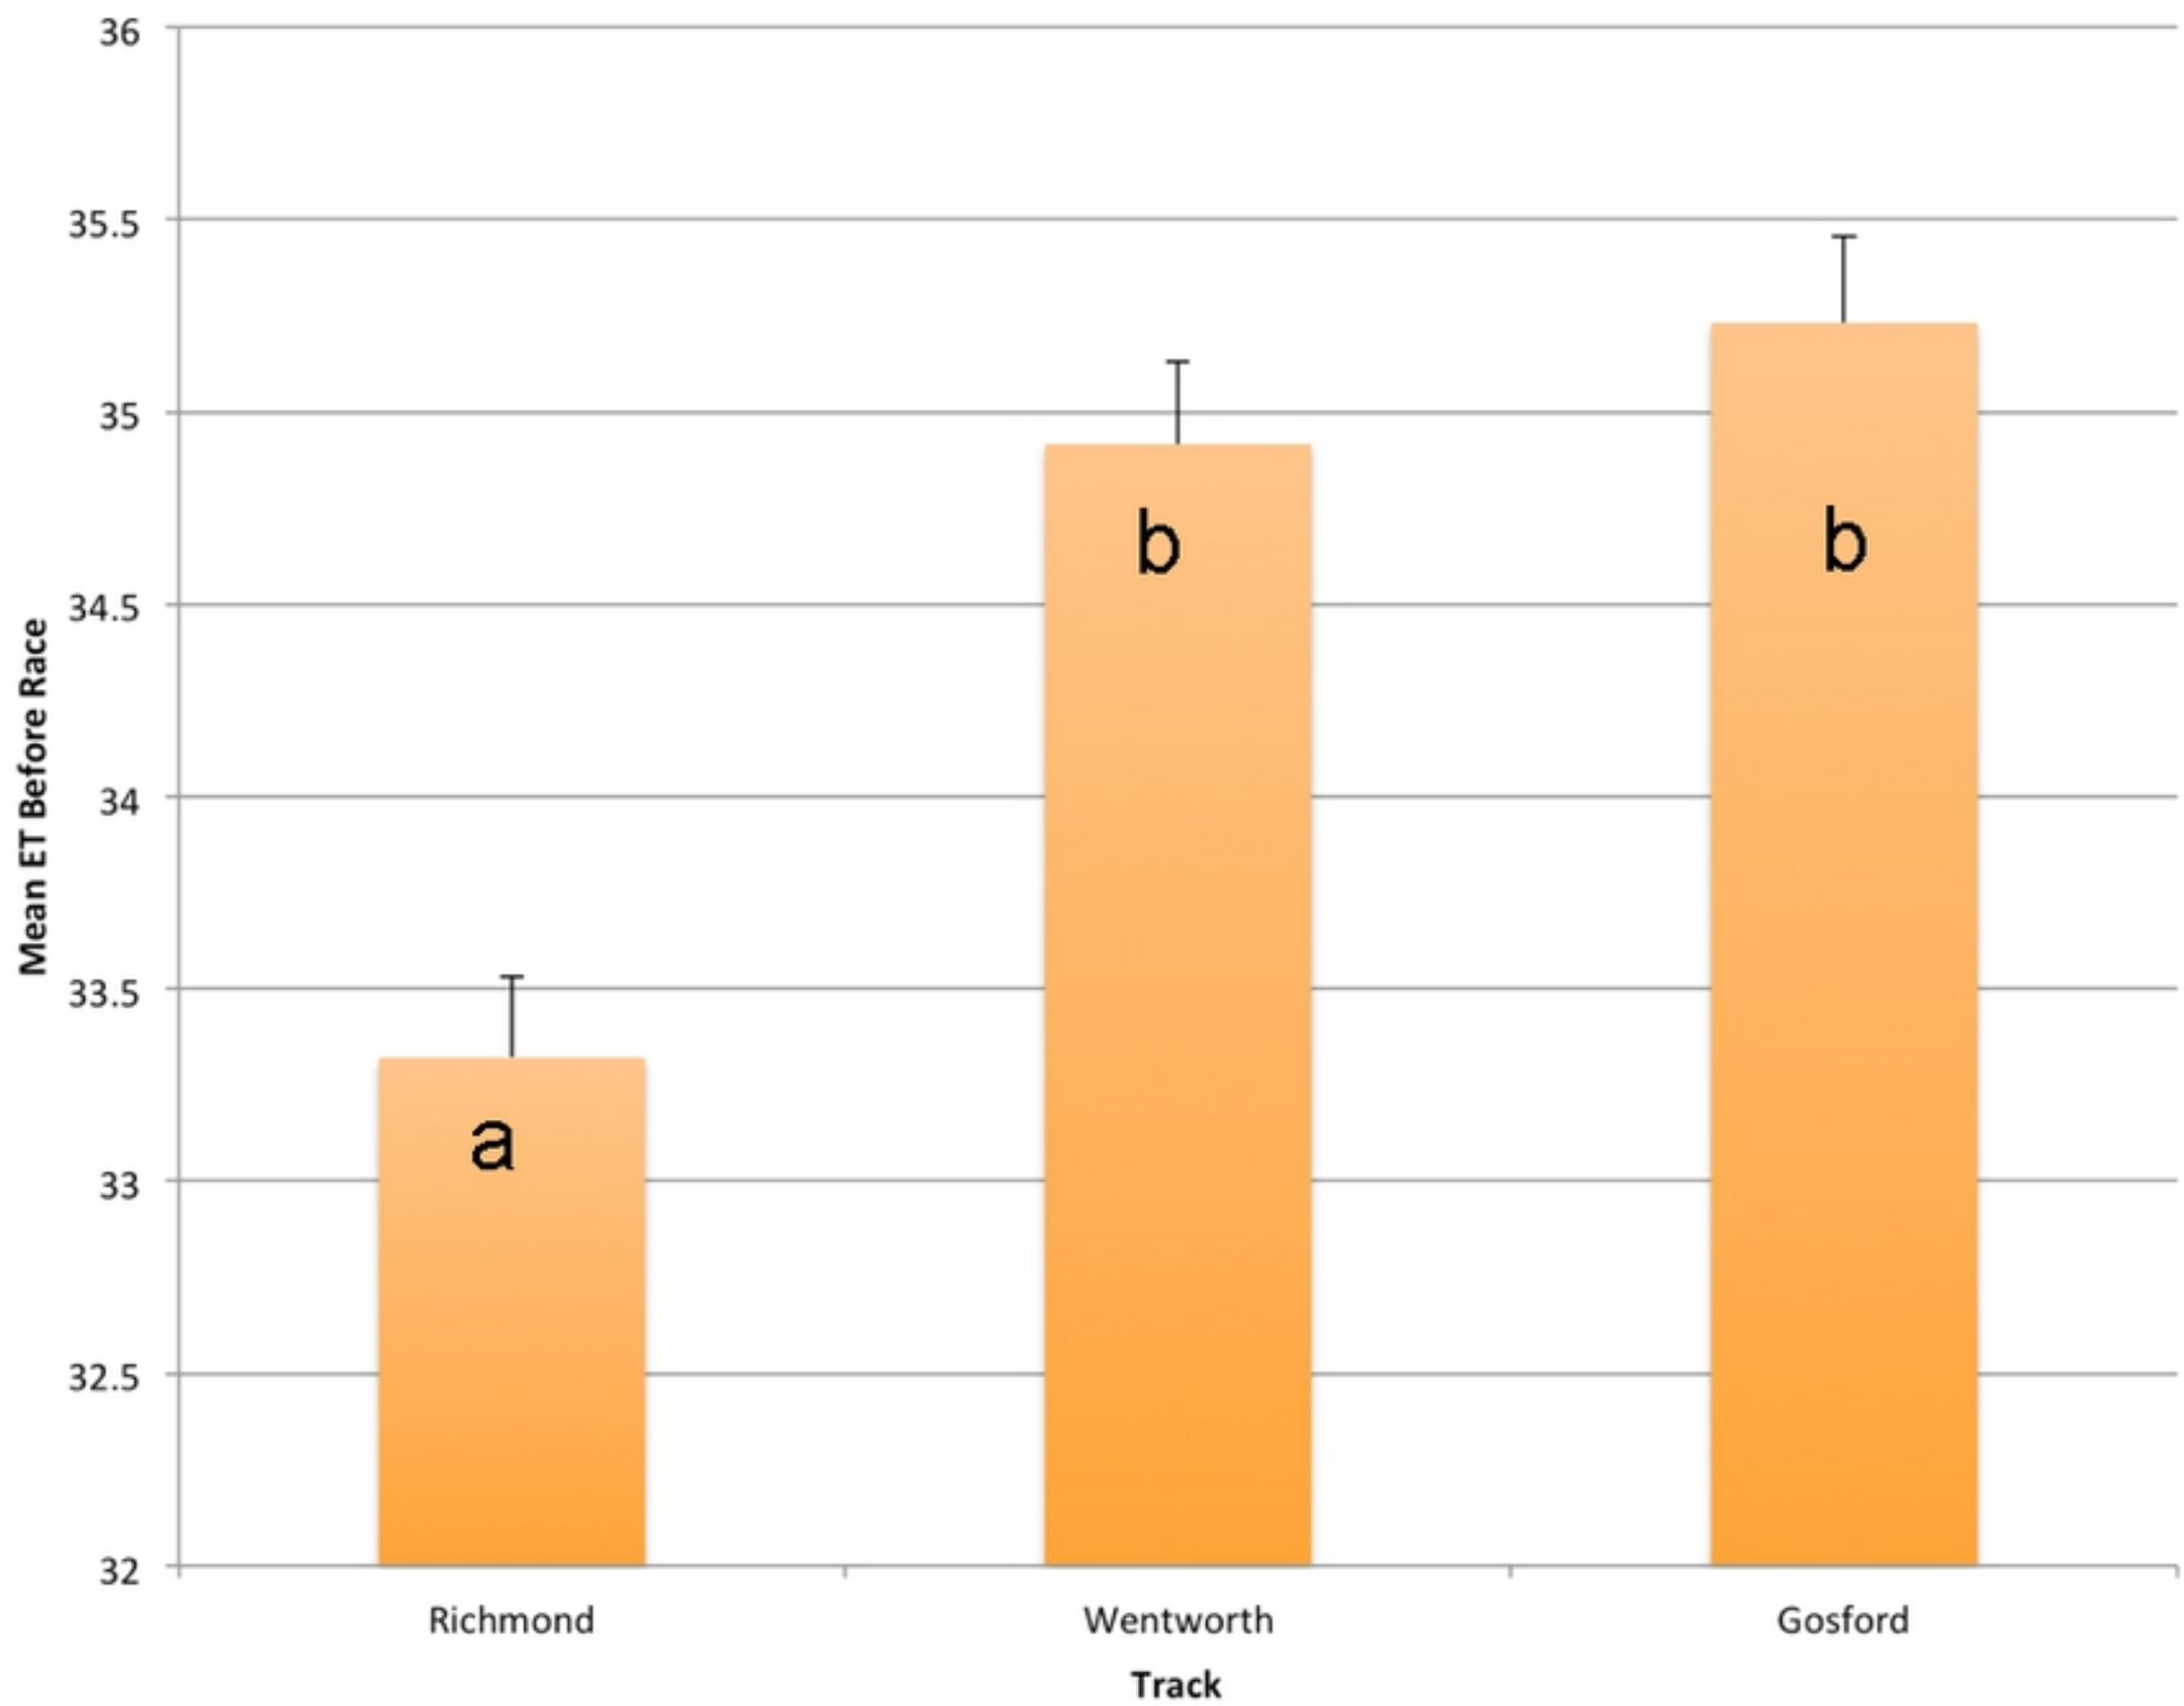

Figure 6



Race effect plot

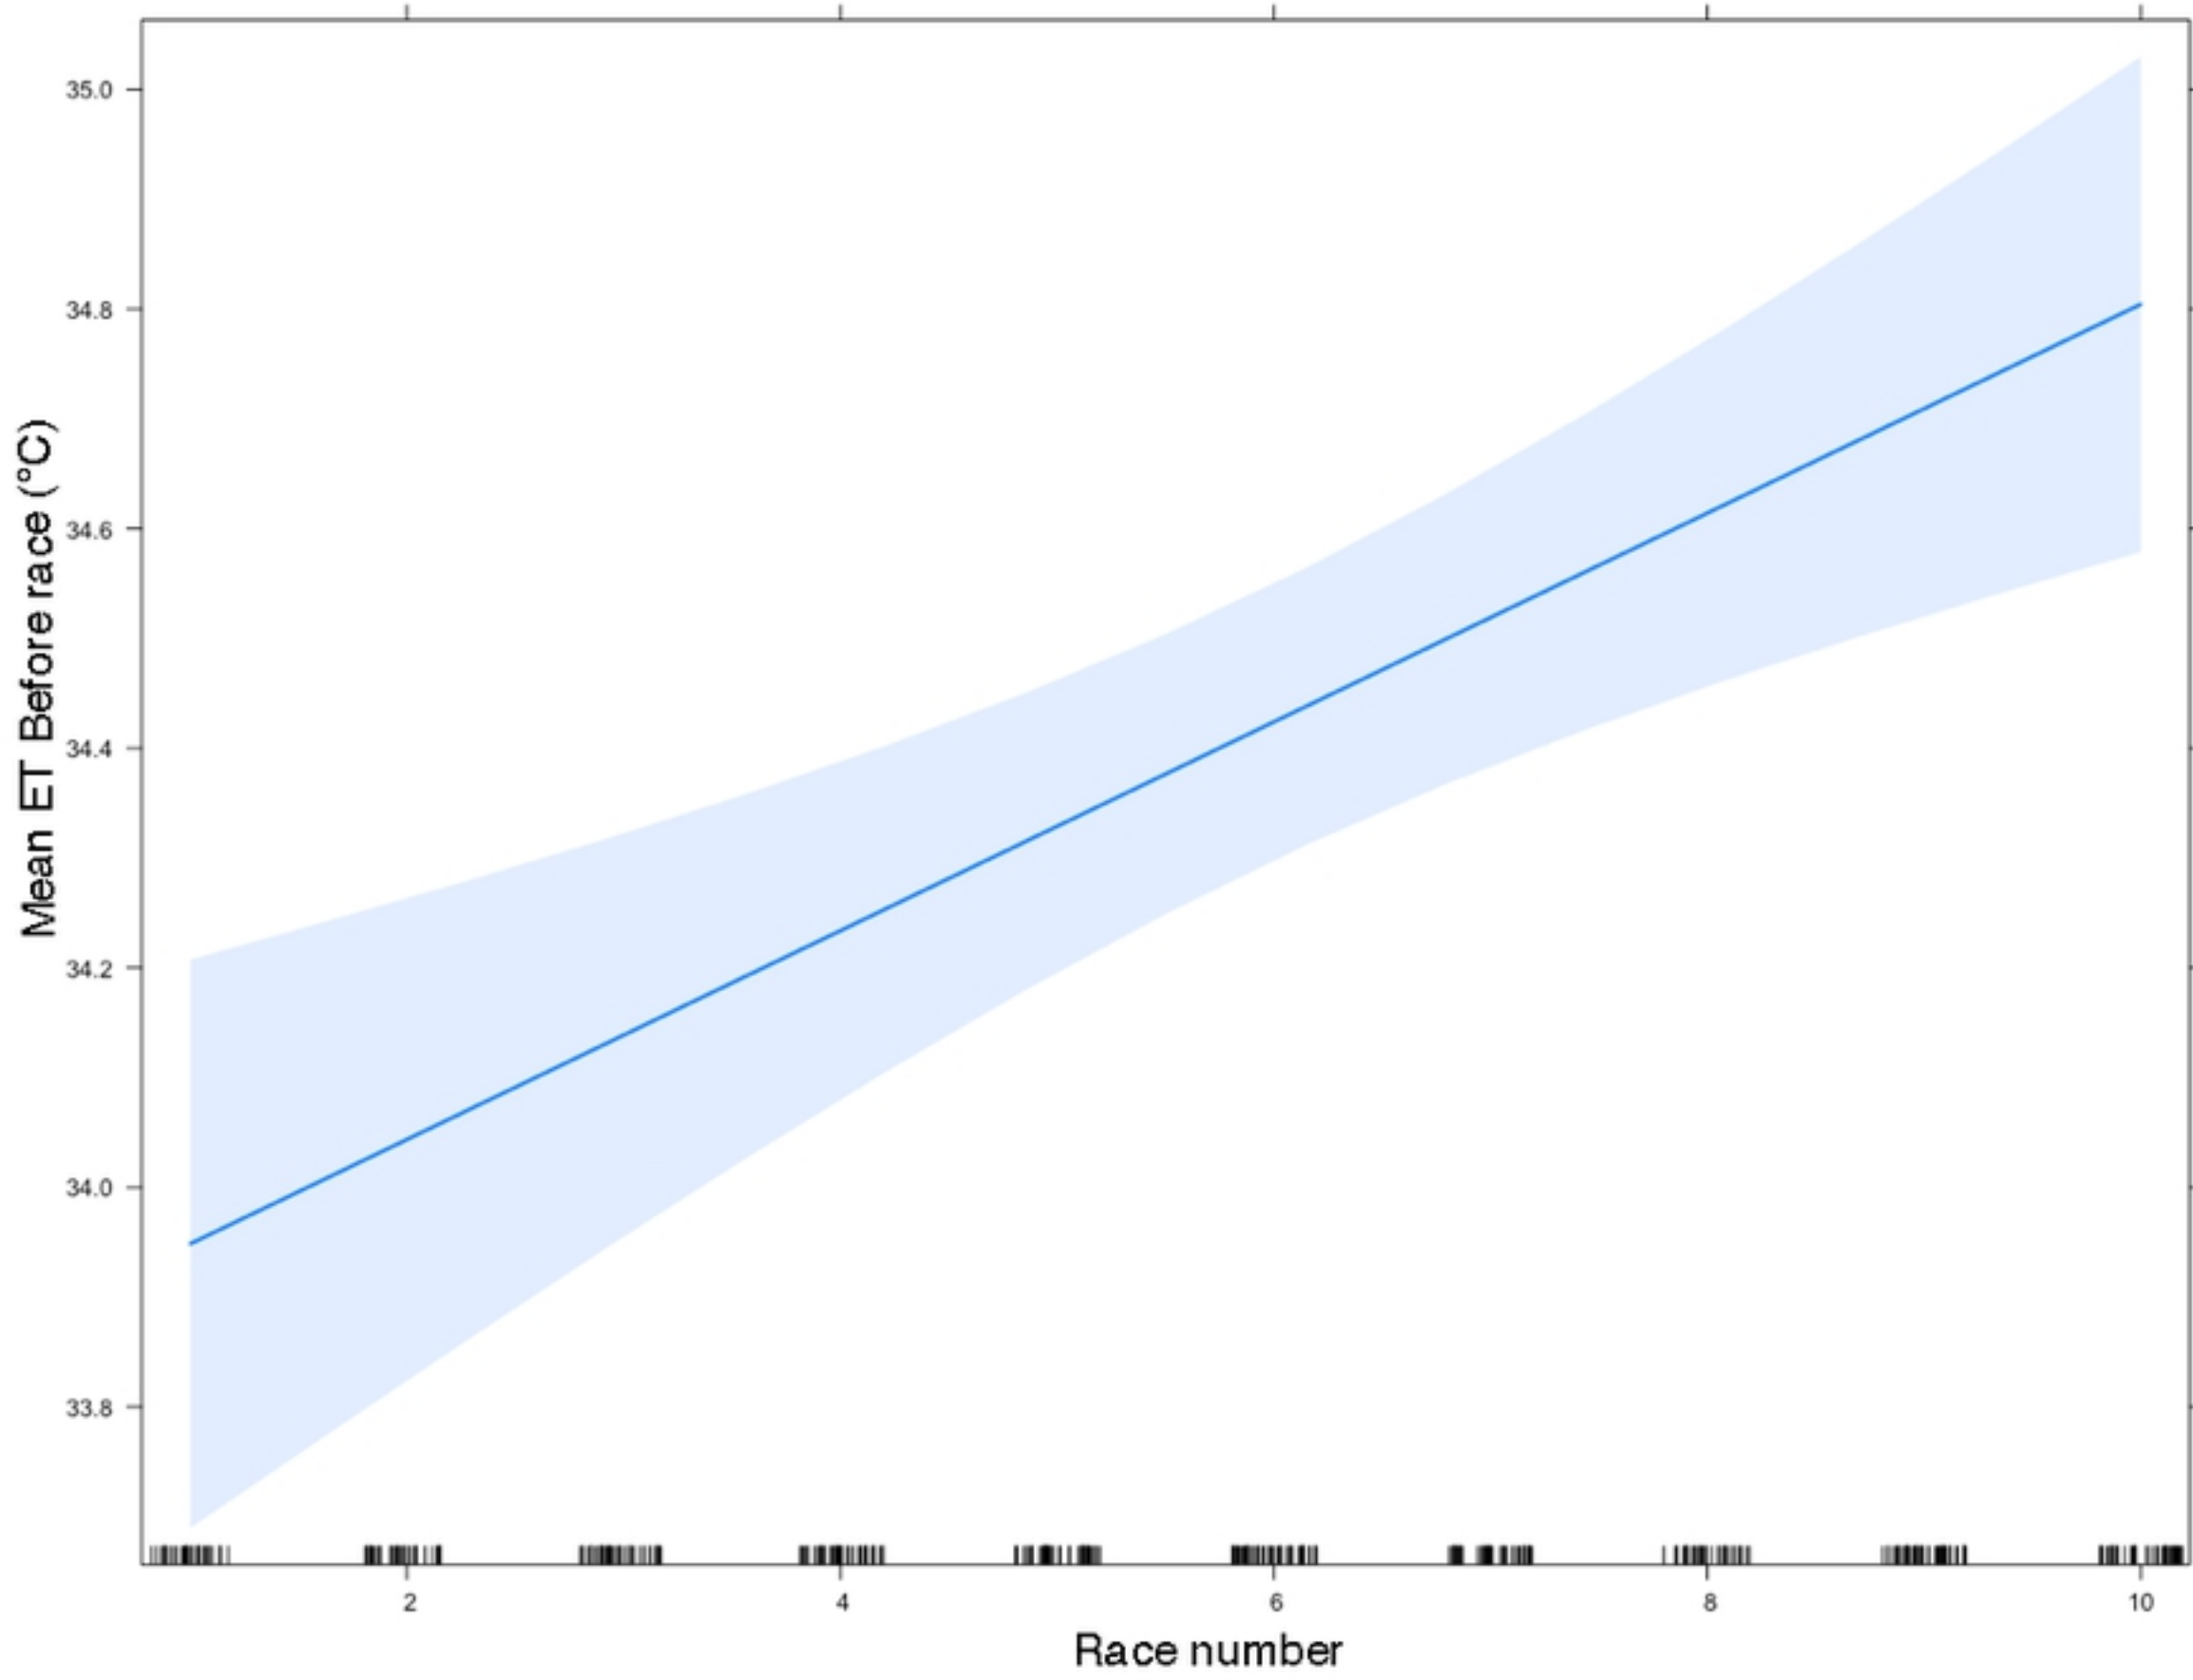

Figure 7

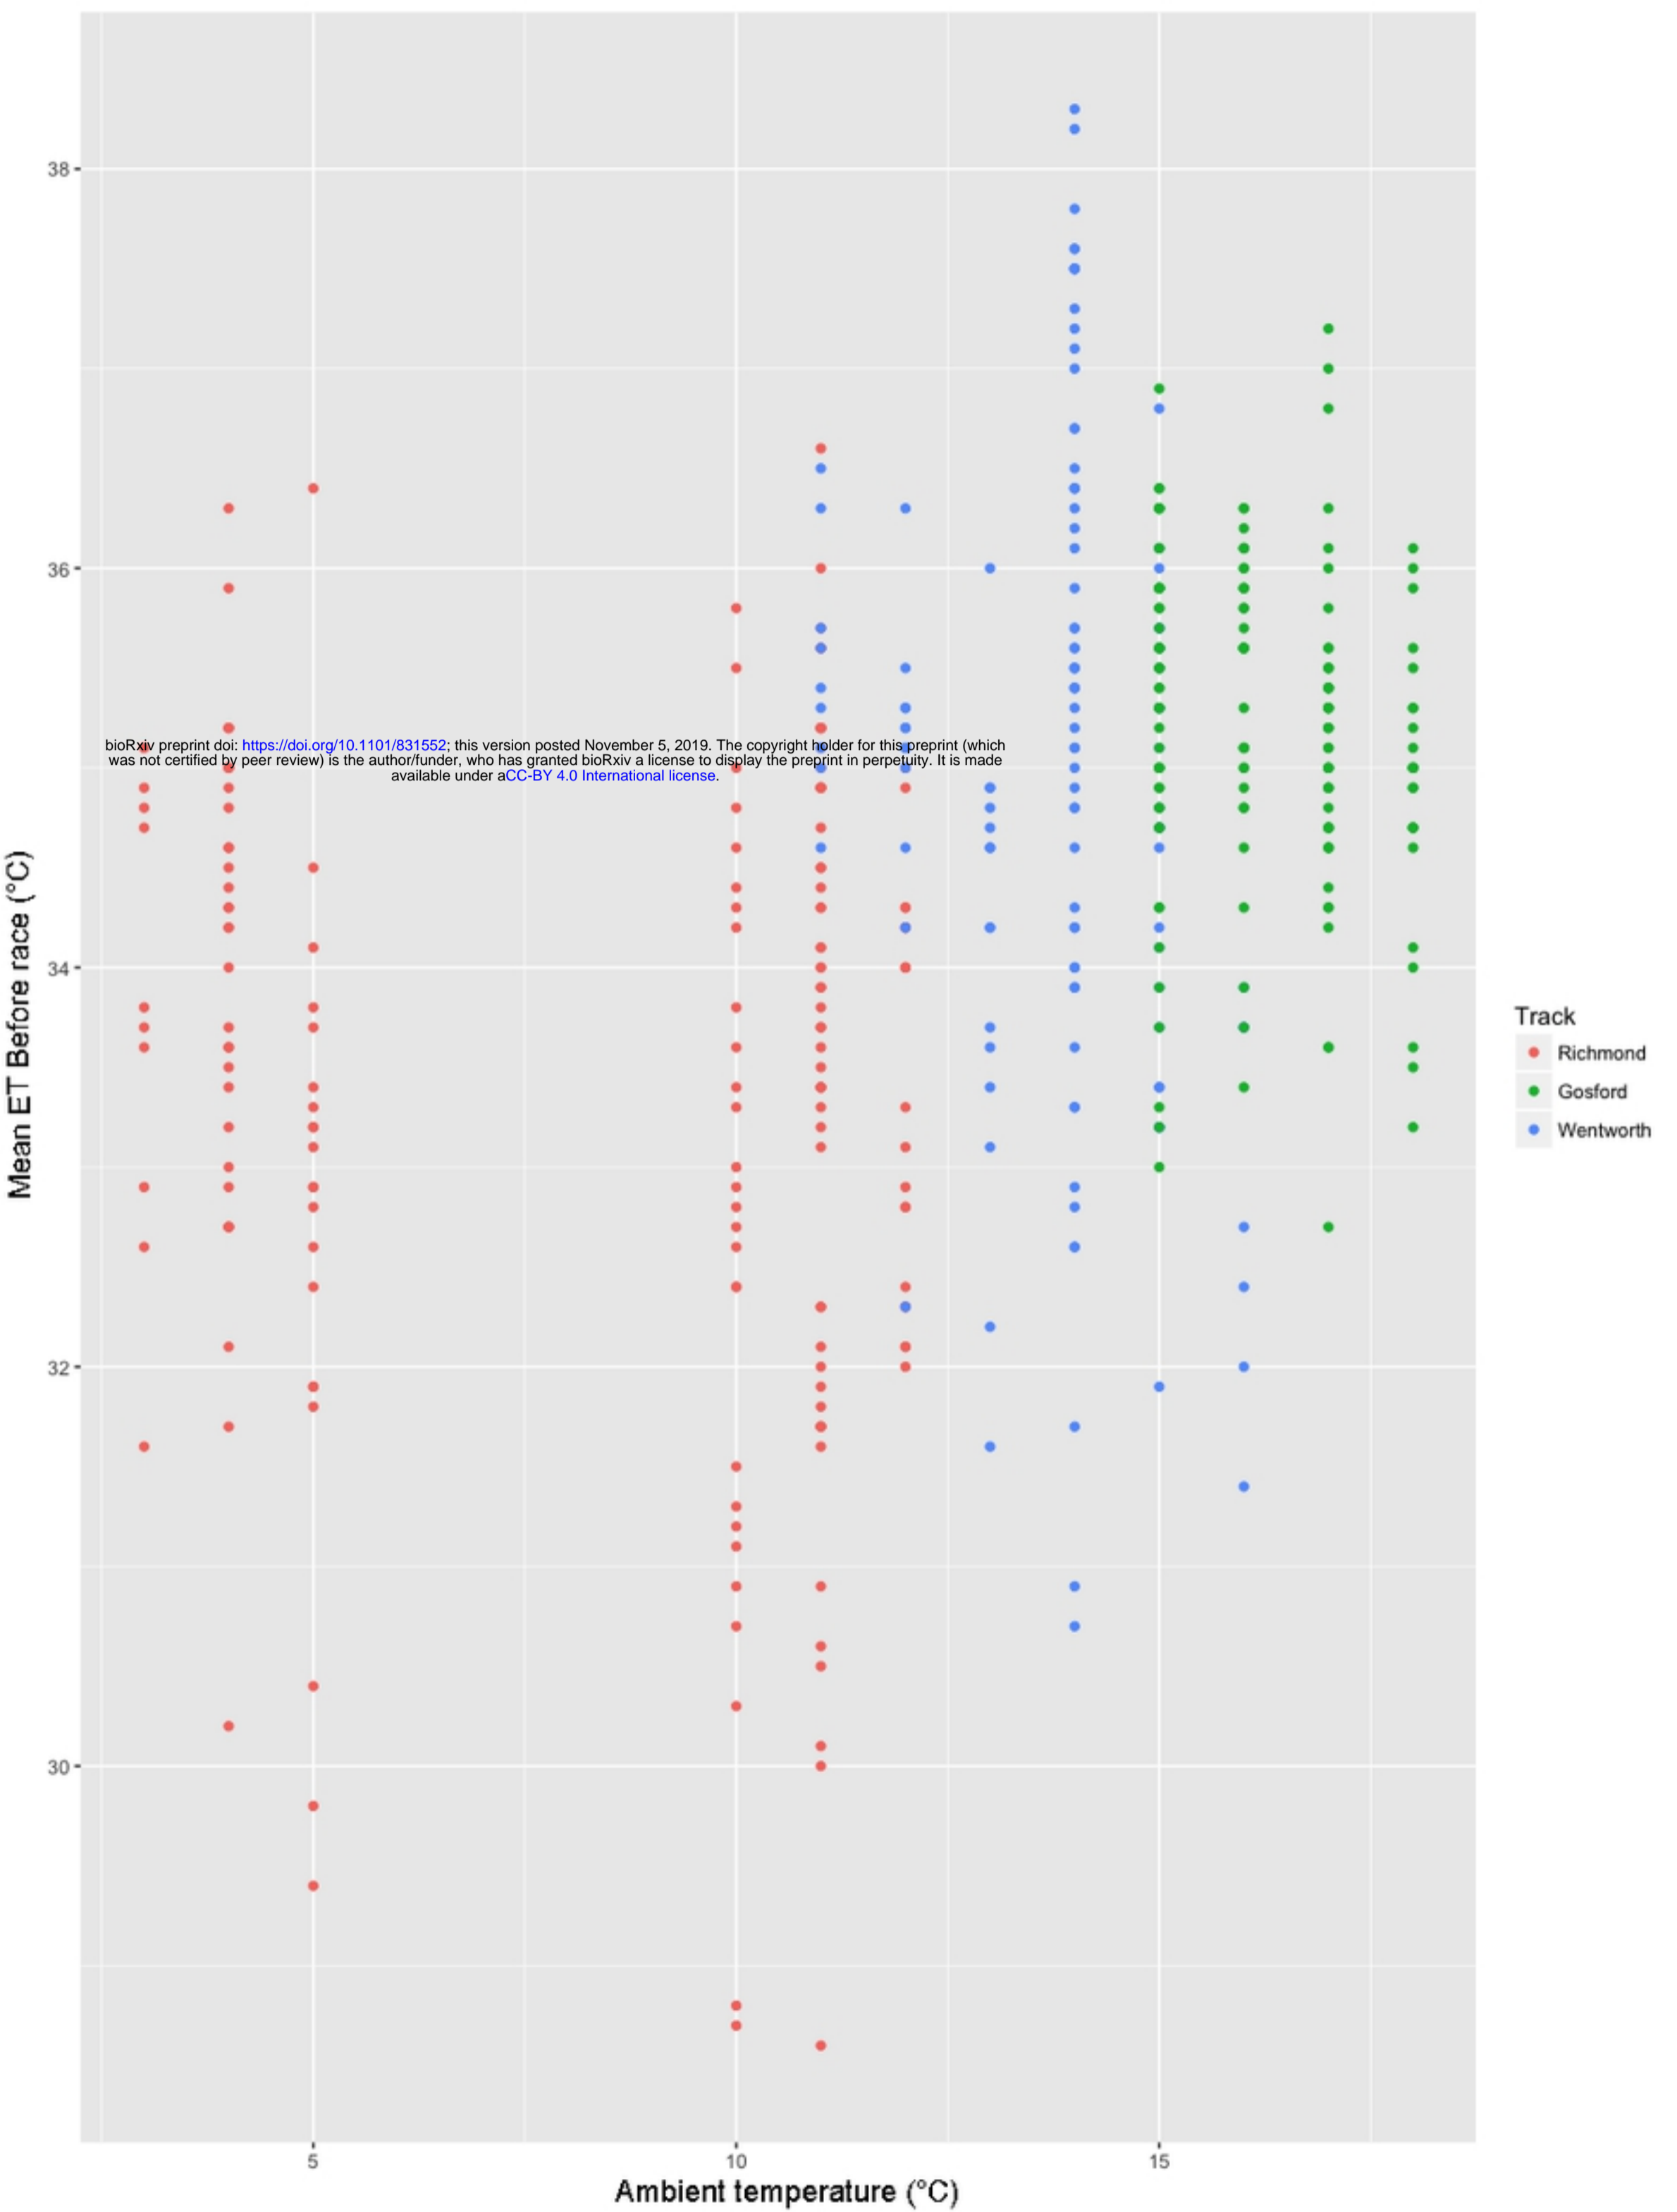

Figure 8

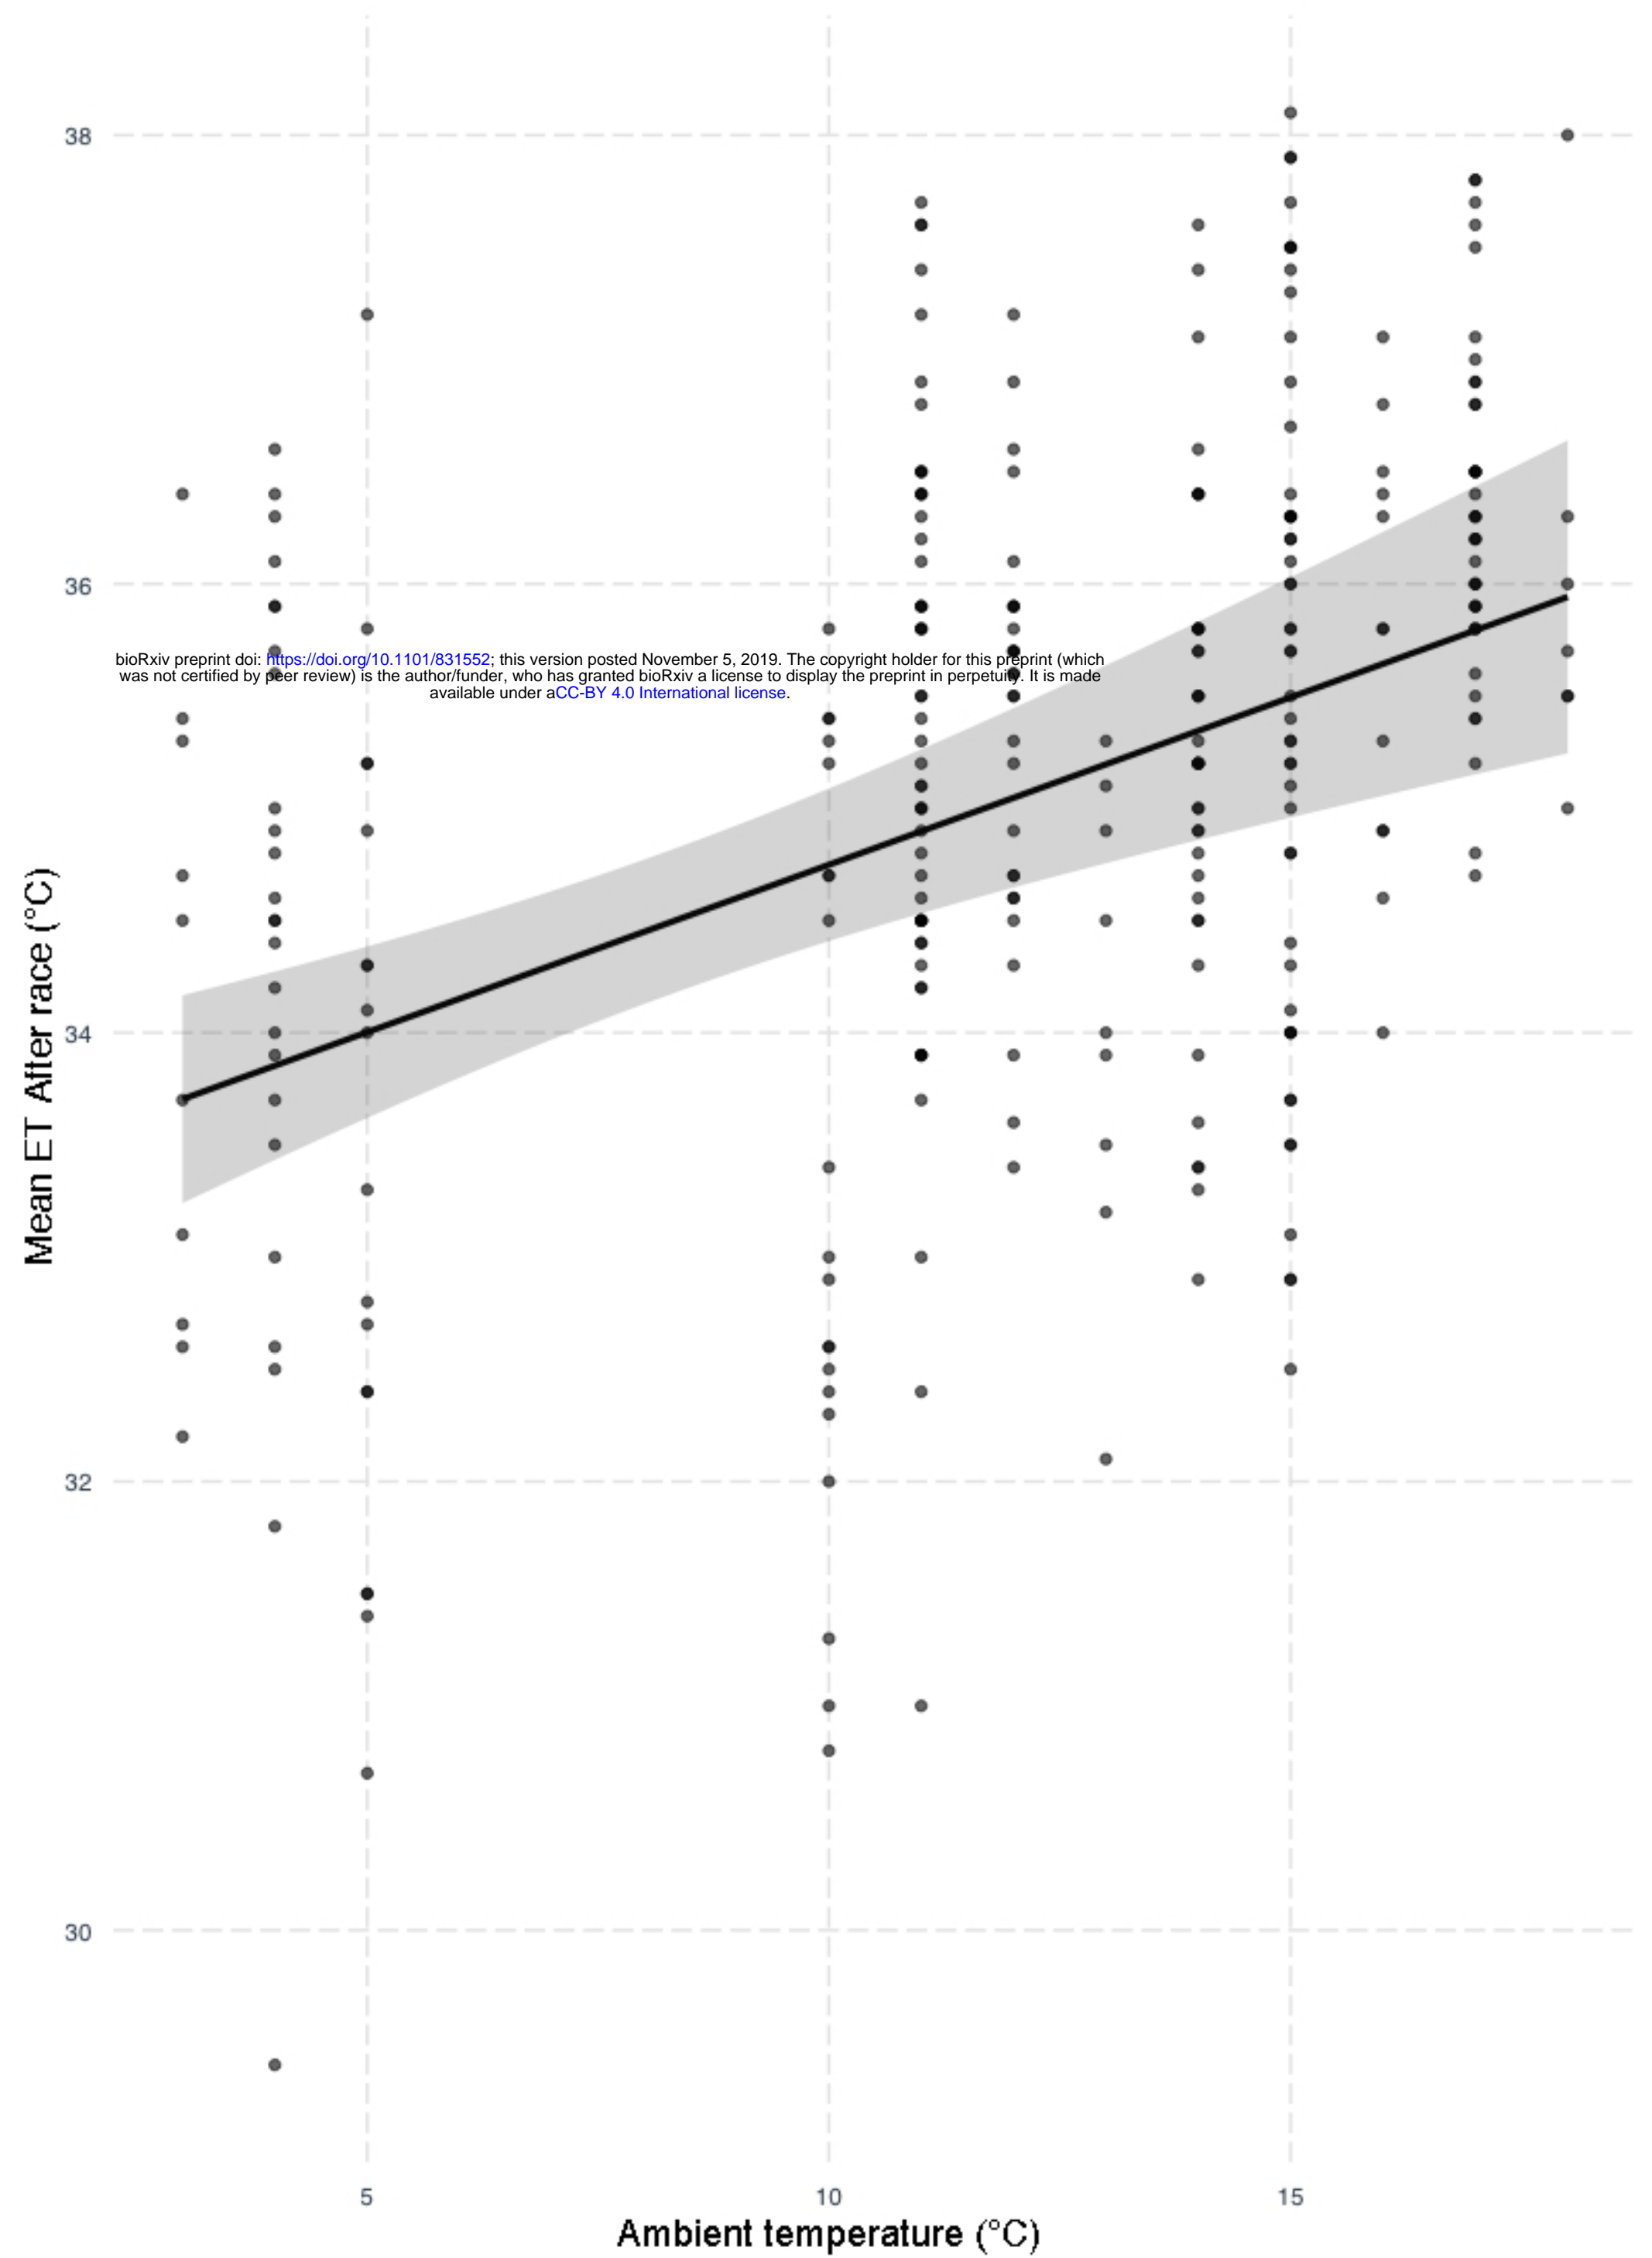

Figure 9
